# Supplementary material
Source: PubMed Central journal article supplement (PMC4497538)
Supplement: NIHMS701923-supplement-supplement_1.pdf [file NIHMS701923-supplement-supplement_1.pdf]

755  
756  
757  
758  
759  
760  
761  
762  
763  
764  
765  
766  
767  
768  
769  
770  
771  
772  
773  
774  
775  
776  
777

Supplementary Materials for  
**Distinct Inflammatory Profiles of Myelin-Reactive T cells from  
Patients with Multiple Sclerosis**

Yonghao Cao, Brittany A. Goods, Khadir Raddassi, Gerald T. Nepom,  
William W. Kwok, J. Christopher Love, David A. Hafler\*

\*Corresponding author. Email: david.hafler@yale.edu

**This PDF file includes:**  
Figs. S1 to S16  
Tables S1 to S8  
References (50-51)

778  
779  
780  
781  
782  
783  
784  
785  
786  
787  
788  
789  
790  
791  
792  
793  
794  
795  
796  
797  
798  
799  
800

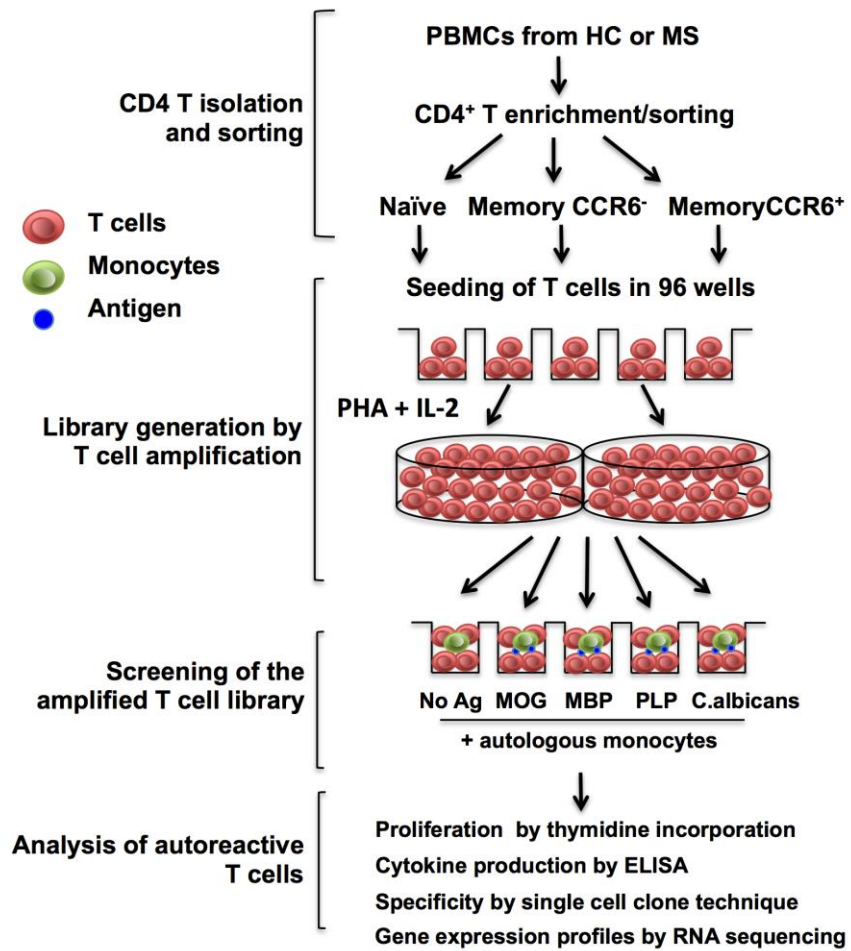

801 **Fig. S1. Schematic representation of amplified T cell library assay.** Naïve, CCR6<sup>-</sup> memory  
802 and CCR6<sup>+</sup> memory CD4<sup>+</sup> T cells from patients with MS or healthy controls (HC) were sorted  
803 and seeded at 2,000 cells per well in 96-well plates, and stimulated with PHA and IL-2 in the  
804 presence of irradiated allogeneic feeder cells for 2 weeks. After the stimulation cocktail was  
805 washed out, the cells from each well were re-stimulated by autologous monocytes and myelin  
806 peptides, *C. albicans*. Myelin-specific CD4<sup>+</sup> T cell proliferation (day 5) and cytokine production  
807 (day 7) were measured by <sup>3</sup>H-thymidine incorporation and ELISA assay.  
808

809  
810  
811  
812  
813  
814  
815  
816  
817  
818  
819  
820  
821  
822  
823  
824  
825  
826  
827  
828  
829  
830  
831  
832  
833  
834  
835  
836

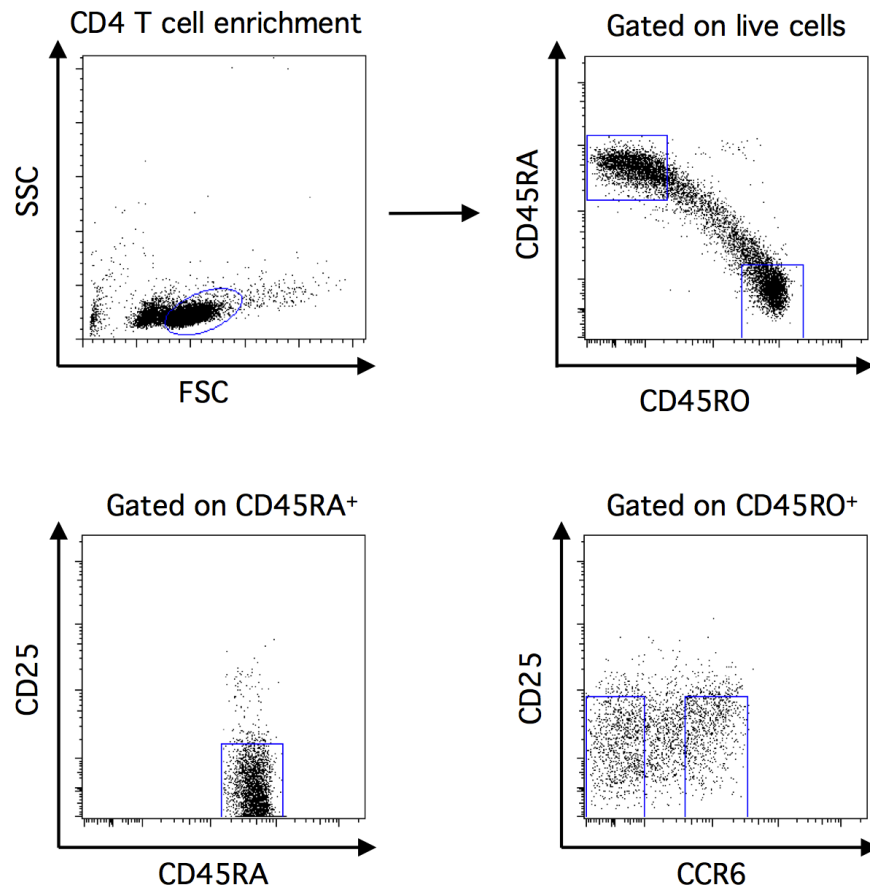

**Fig. S2. Sorting strategy of each T cell subpopulation.** Total CD4<sup>+</sup> T cells were enriched by negative selection from PBMCs. Untouched CD4<sup>+</sup> T cells were stained with monoclonal antibodies against CD45RA, CD45RO, CD25 and CCR6 for T cell subpopulation isolation. The following subpopulations were gated and sorted: Naïve (CD45RA<sup>+</sup>CD45RO<sup>-</sup>CD25<sup>-</sup>), CCR6<sup>-</sup> memory (CD45RA<sup>-</sup>CD45RO<sup>+</sup>CD25<sup>-</sup>CCR6<sup>-</sup>), and CCR6<sup>+</sup> memory (CD45RA<sup>-</sup>CD45RO<sup>+</sup>CD25<sup>-</sup>CCR6<sup>+</sup>).

837  
838  
839

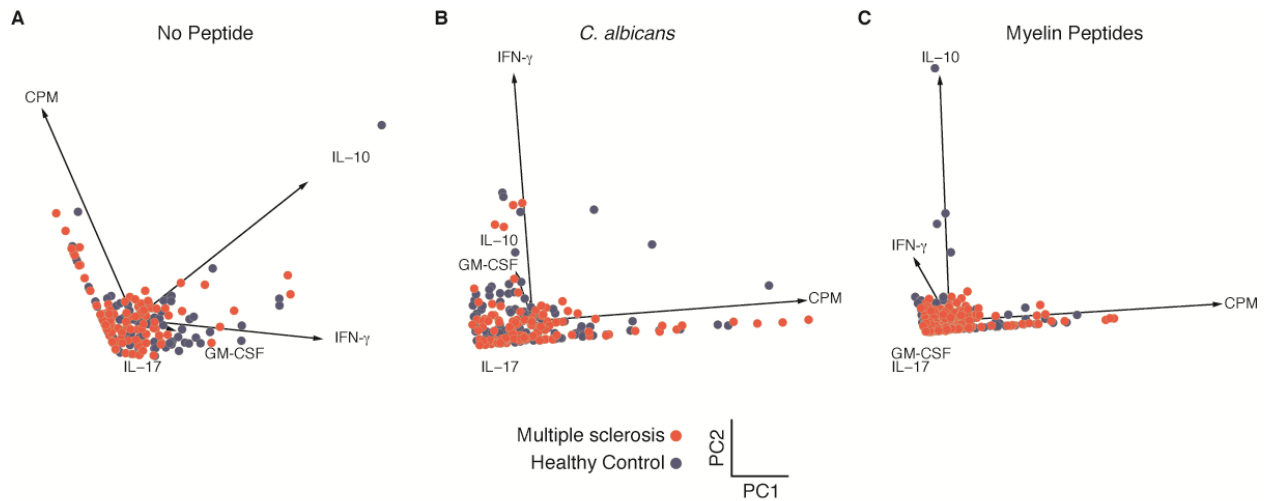

840

841 **Fig. S3. Principal component analysis of functional phenotypes of myelin-reactive**  
842 **CD4<sup>+</sup>CCR6<sup>-</sup> T cells.** Scatterplots show measured penta-dimensional responses (proliferation,  
843 IFN- $\gamma$ , IL-17, GM-CSF and IL-10) for individual amplified T cell libraries (each dot) projected  
844 onto the first two principal components. Analysis is shown for (A) no peptide, (B) *C. albicans*,  
845 and (C) myelin peptides from eight healthy subjects and eight MS patients. Projections of the  
846 vectors for each data class are also shown and annotated for reference. Statistically significant p-  
847 values are shown below: *C. albicans*-reactive T cells for proliferation ( $p = 0.0017$ ) and GM-CSF  
848 ( $p < 0.0001$ ).  
849

850  
851  
852  
853  
854  
855

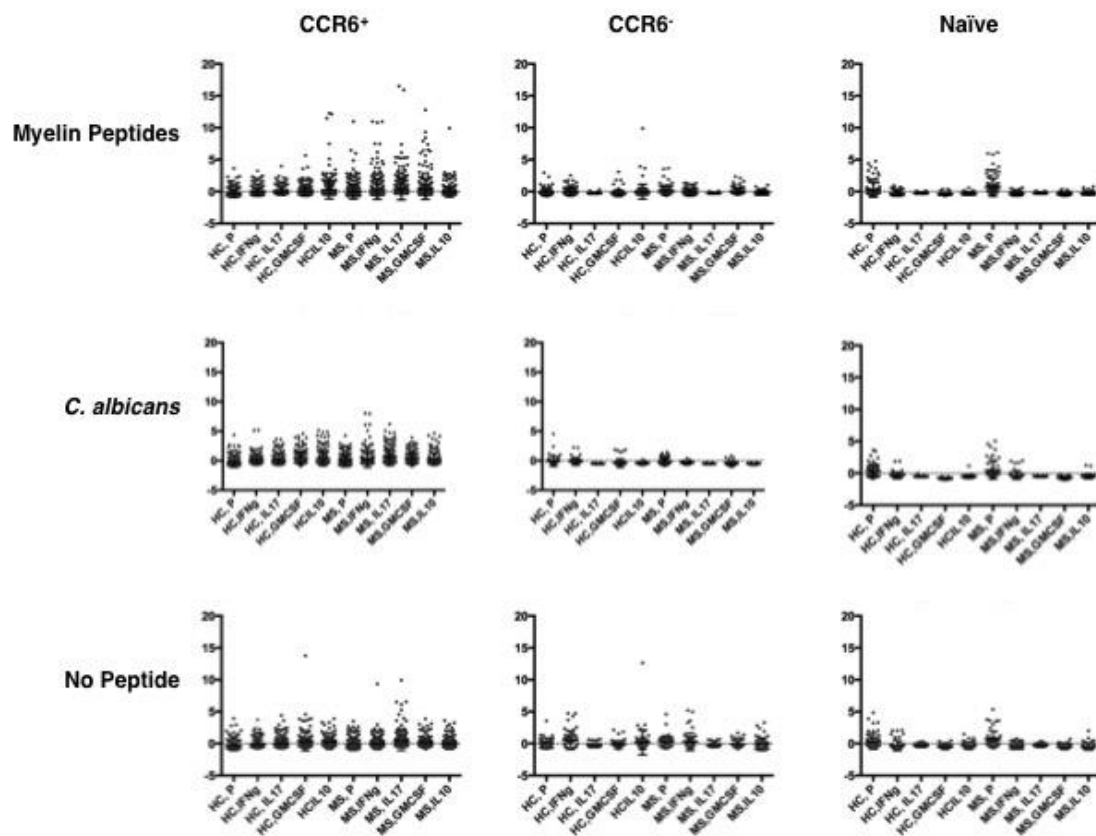

856  
857  
858  
859  
860  
861  
862  
863

**Fig. S4. Functional phenotypes of CCR6<sup>+</sup> memory, CCR6<sup>-</sup> memory, and naïve CD4<sup>+</sup> T cells.** Plots show all z –score normalized data for no peptide, *C. albicans*, and myelin peptides corresponding to PCA analysis presented in Figure 2 and Figure S3.

864  
865  
866  
867  
868  
869  
870  
871  
872  
873  
874  
875  
876  
877  
878  
879

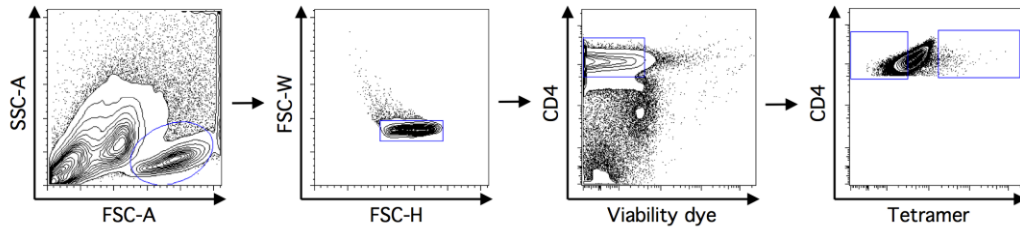

**Fig. S5. Representative tetramer staining and sorting strategy of each library from MS patients and healthy controls were chosen for single-cell cloning and RNA sequencing.** Two of the highest proliferated wells (red dots shown in fig. S7) were picked and stained by DR4 myelin peptides tetramers (MOG<sub>97-109</sub> tetramers and PLP<sub>180-199</sub> tetramers). MOG<sub>97-109</sub> tetramer-positive and PLP<sub>180-199</sub> tetramer-positive T cells were sorted for single-cell cloning. Tetramer-positive and tetramer-negative T cells were sorted for RNA sequencing.

880  
881  
882  
883

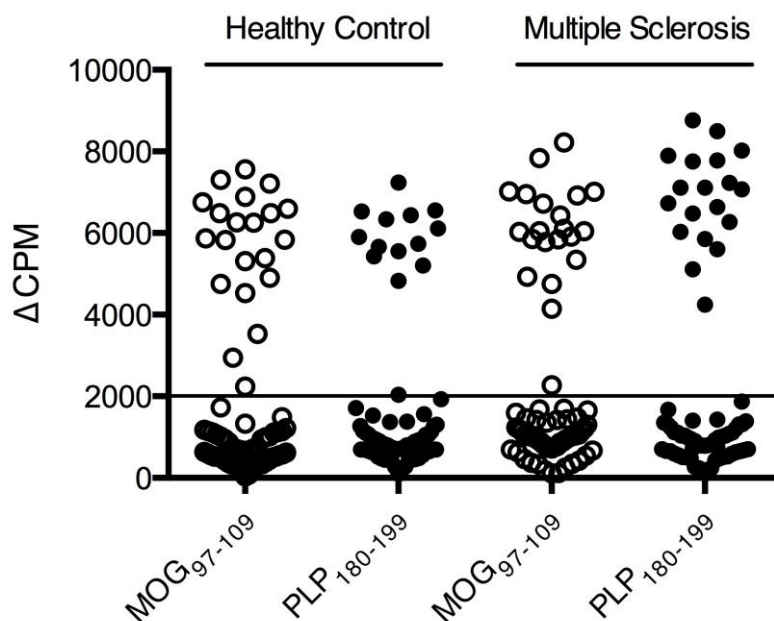

884  
885  
886  
887  
888  
889  
890  
891  
892  
893  
894

**Fig. S6. Specificity of myelin-reactive CD4<sup>+</sup> T cells.** CCR6<sup>+</sup> memory CD4<sup>+</sup> T cells from two paired HLA-DR4 healthy subjects and DR4 MS patients were amplified by PHA and IL-2, and scored for proliferation upon re-stimulation with autologous monocytes pulsed with DR4 peptides. The highest sorted wells were used for single-cell sorting using MOG<sub>97-109</sub>- and PLP<sub>180-199</sub>-tetramers. Single-cell clones were stimulated by monocytes pulsed with no peptide, MOG<sub>97-109</sub> or PLP<sub>180-199</sub>. Cell proliferation of each clone was measured on day 5. Dot plots show ΔCPM, which was calculated as peptide pulsed culture CPM – no peptide-pulsed culture CPM. Cultures were scored positive when ΔCPM exceeded 2,000 and the stimulation index was > 3.

895  
896  
897  
898  
899  
900  
901  
902  
903  
904  
905  
906  
907  
908  
909  
910  
911  
912  
913  
914  
915  
916  
917  
918  
919  
920

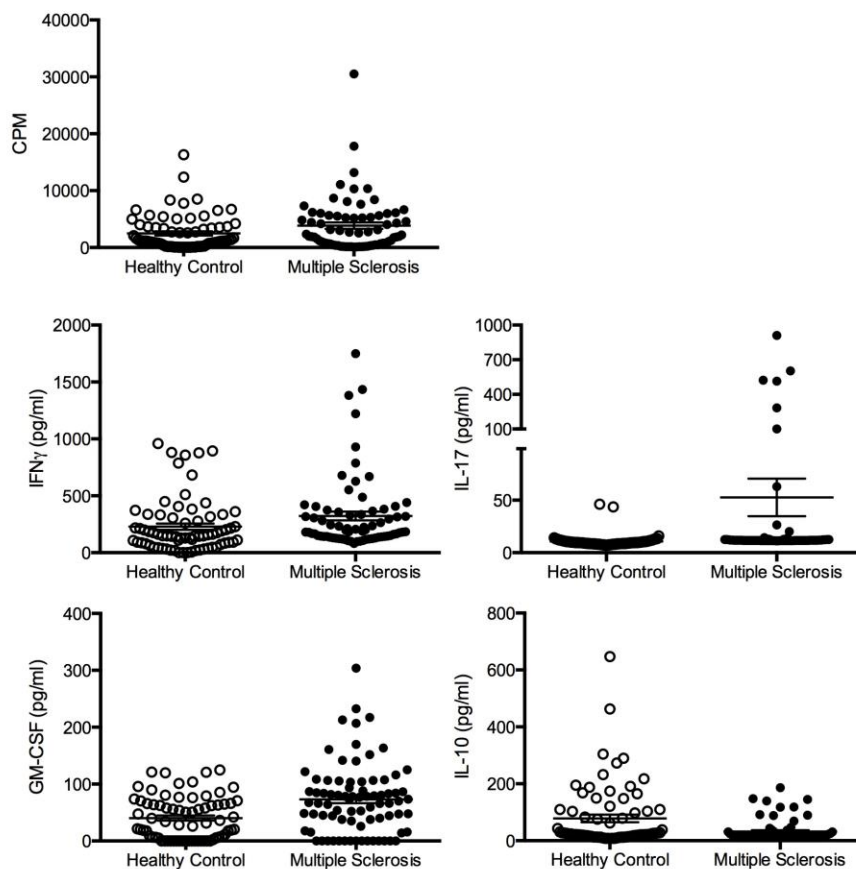

921 **Fig. S7. Phenotypic analysis of myelin-specific single cell clones.** Tetramer-sorted single cell  
922 clones (n = 144) were stimulated with DR4 myelin peptides (MOG<sub>97-109</sub> and PLP<sub>180-199</sub>) to verify  
923 the specificity. The cell proliferation and cytokine production of these clones were measured on  
924 day 5 after stimulation. Data were shown as mean  $\pm$  SEM. The functional profiles of responsive  
925 clones were shown as hierarchical clusters in Figure 3.  
926



927  
928  
929  
930  
931  
932  
933  
934  
935  
936  
937  
938  
939  
940  
941  
942  
943  
944  
945  
946  
947  
948  
949  
950  
951  
952  
953  
954  
955  
956  
957

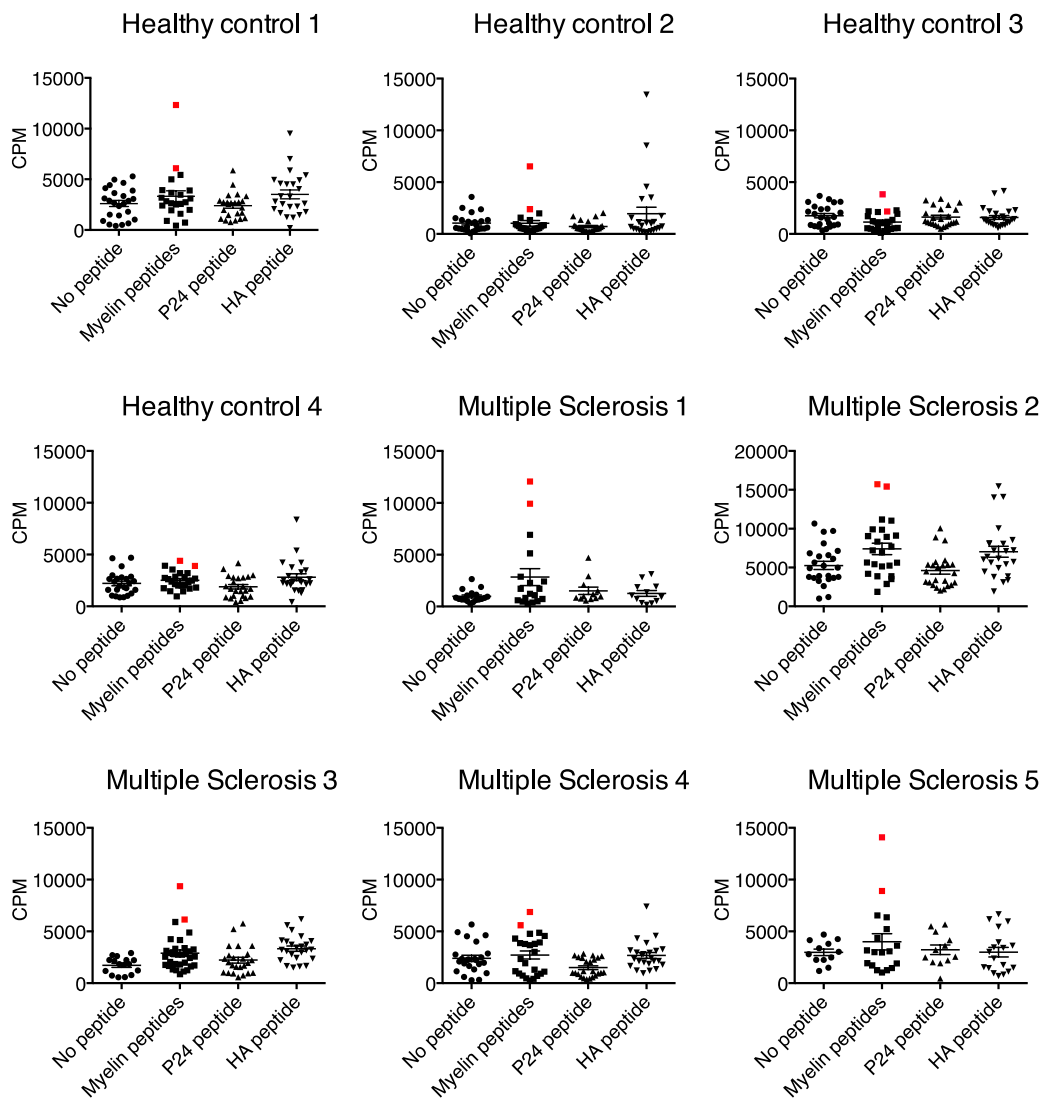

**Fig. S8. Cell proliferation of each well from MS patients and healthy controls chosen for RNA sequencing.** Four HLA-DR4 healthy controls and five HLA-DR4 MS samples were run. CCR6<sup>+</sup> memory T cells were amplified by PHA and IL-2 in 96-well plates, and stimulated by irradiated autologous monocytes and DR4 myelin peptides (MOG<sub>97-109</sub> and PLP<sub>180-199</sub>). Two of the highest proliferated wells (red dots) of each sample were picked for RNA sequencing. HIV peptide (P24<sub>166-197</sub>) and hemagglutinin peptide (HA<sub>306-318</sub>) used as a negative and positive control.

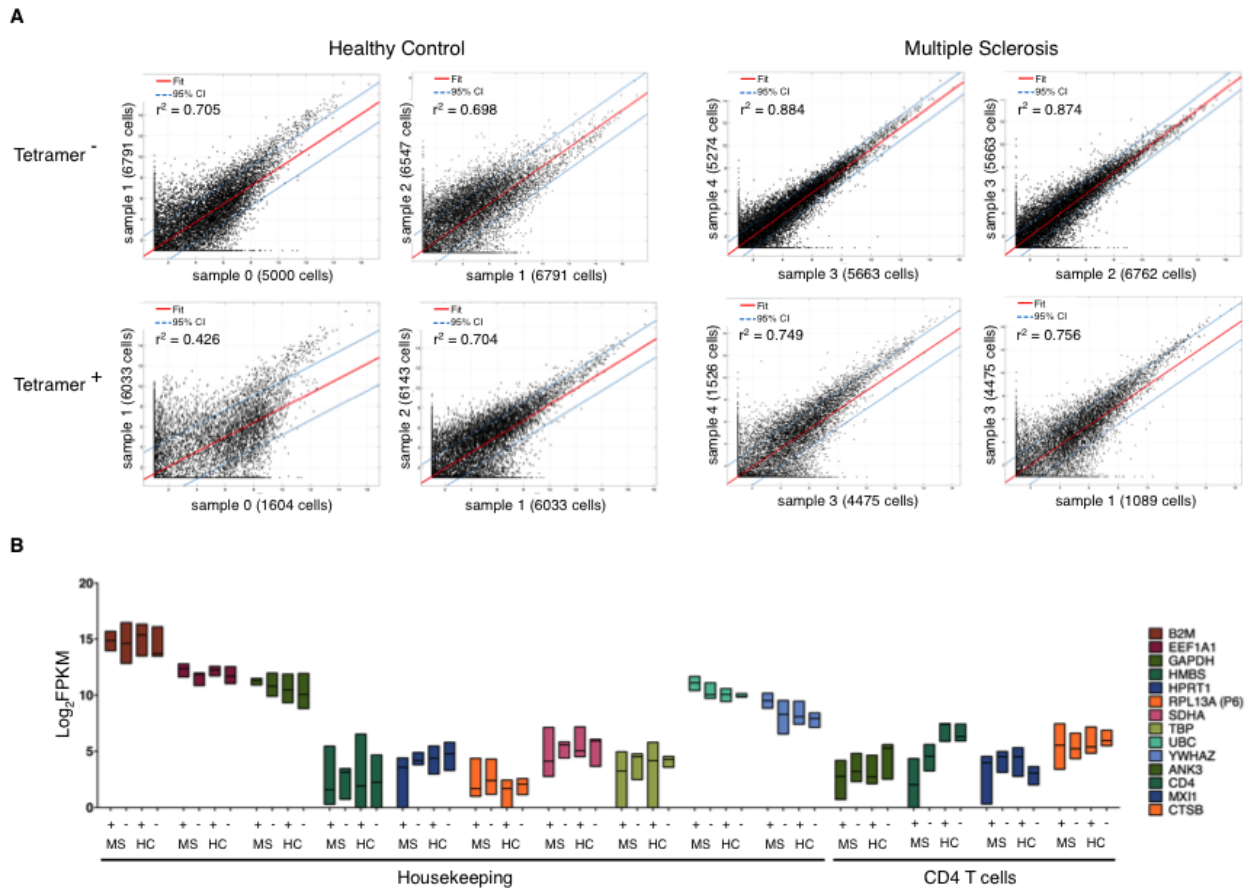

958  
 959  
 960  
 961  
 962  
 963  
 964  
 965  
 966  
 967  
 968  
 969

**Fig. S9. Correlation of RNA-seq data across biological replicates.** (A) Correlation scatter plots of  $\log(\text{FPKM}+1)$  values for indicated samples. Linear regression performed in MATLAB using regression toolbox and  $r^2$  values shown. Red lines show the linear fit and blue dotted lines indicate the 95% confidence interval bounds. (B) Box-plots are shown for each sample included in down stream analysis ( $n = 3$  HC tetramer<sup>+</sup> and tetramer<sup>-</sup>,  $n = 5$  MS tetramer<sup>+</sup> and tetramer<sup>-</sup>). Line indicates median, boxes extend to the minimum and maximum of replicates included. Housekeeping (50) and CD4 T cell specific (51) genes are shown.

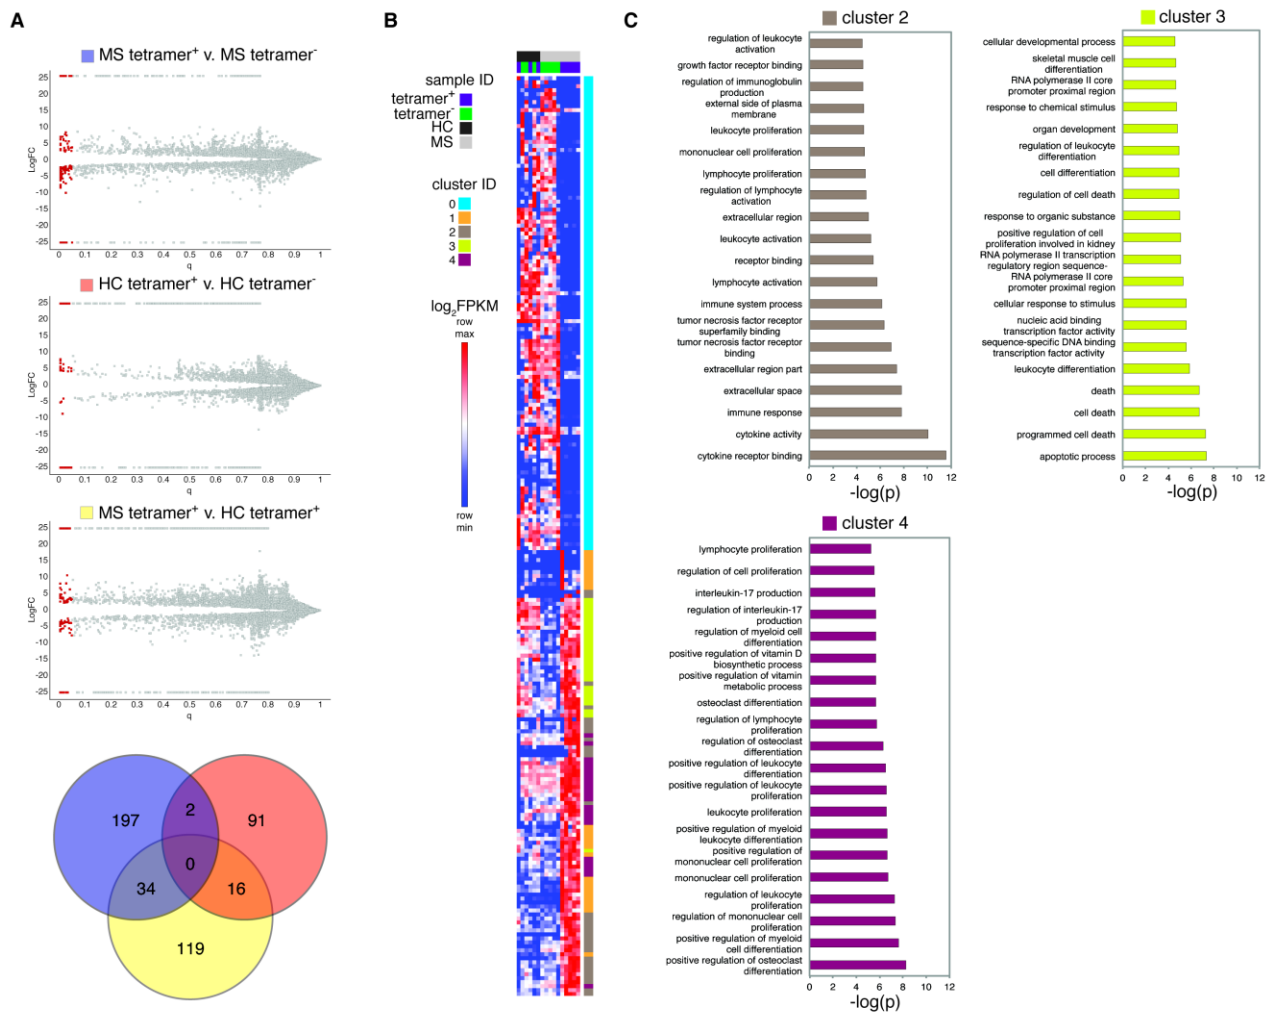

971  
 972  
 973  
 974  
 975  
 976  
 977  
 978  
 979  
 980  
 981

**Fig. S10. Differential expression analysis of myelin-reactive T cells in MS and healthy controls.** (A) Volcano plots show differentially expressed (DE) genes ( $q < 0.05$ , red), and Venn diagram shows overlap between DE genes from each comparison purple (MS tetramer<sup>+</sup> vs. MS tetramer<sup>-</sup>), pink (HC tetramer<sup>+</sup> vs. HC tetramer<sup>-</sup>), and yellow (MS tetramer<sup>+</sup> vs. HC tetramer<sup>+</sup>). (B) DE genes unique to MS tetramer<sup>+</sup> samples were k means clustered for columns ( $k = 4$ ) and rows ( $k = 5$ ) using GeneE. Clusters are shown in colored bars. (C) Genes from each cluster were used to perform GO analysis using FuncAssociate to identify biological functions.  $-\log P$  for each function is plotted for clusters that were found to have enriched functions.

982  
983  
984  
985  
986  
987  
988  
989  
990  
991  
992  
993  
994  
995  
996  
997  
998  
999  
1000  
1001

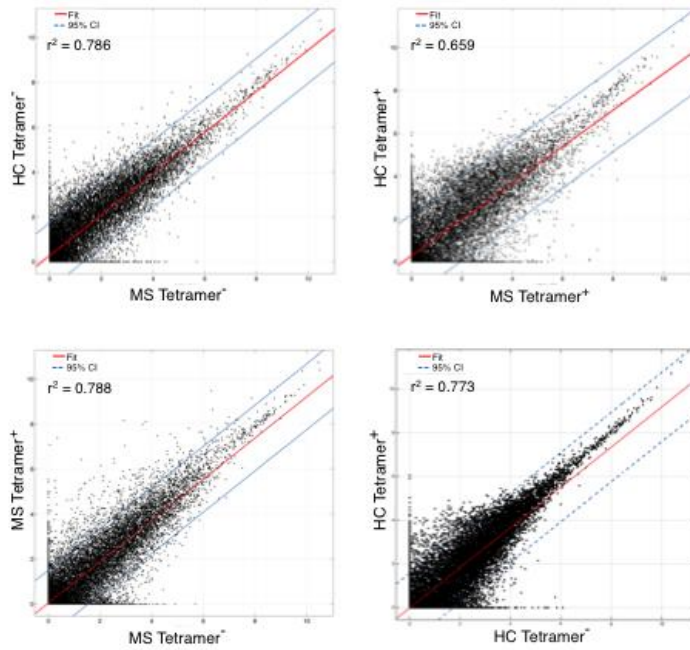

**Fig. S11. Correlation scatter plots.** Correlation scatter plots of  $\log(\text{averageFPKM}+1)$  values for indicated samples. Genes whose expression was zero for all conditions were removed from the data set. Linear regression performed in MATLAB using regression toolbox and  $r^2$  values shown. Red lines show the linear fit and blue dotted lines indicate the 95% confidence interval bounds.

1002  
 1003  
 1004  
 1005  
 1006  
 1007  
 1008  
 1009  
 1010  
 1011  
 1012  
 1013  
 1014  
 1015  
 1016  
 1017  
 1018  
 1019  
 1020  
 1021  
 1022  
 1023  
 1024  
 1025

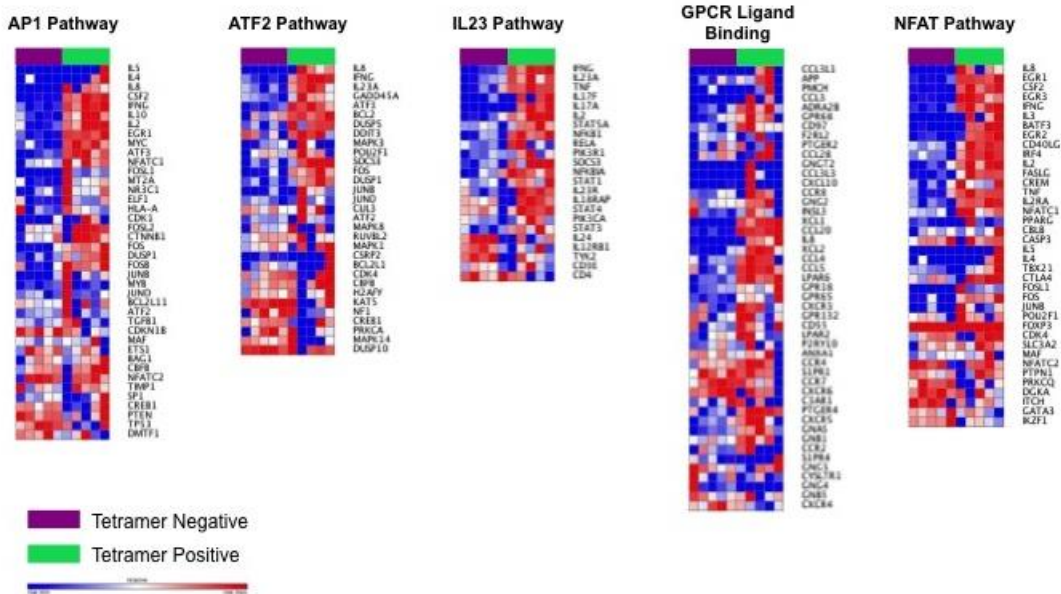

**Fig. S12. Heatmaps of selected enriched gene sets identified by GSEA in MS tetramer positive samples. Log<sub>2</sub>FPKM values were used to generate each heatmap with GeneE.**



1048  
1049  
1050  
1051  
1052  
1053  
1054  
1055  
1056  
1057  
1058  
1059  
1060  
1061  
1062  
1063  
1064  
1065  
1066  
1067  
1068  
1069  
1070  
1071  
1072  
1073  
1074  
1075  
1076  
1077

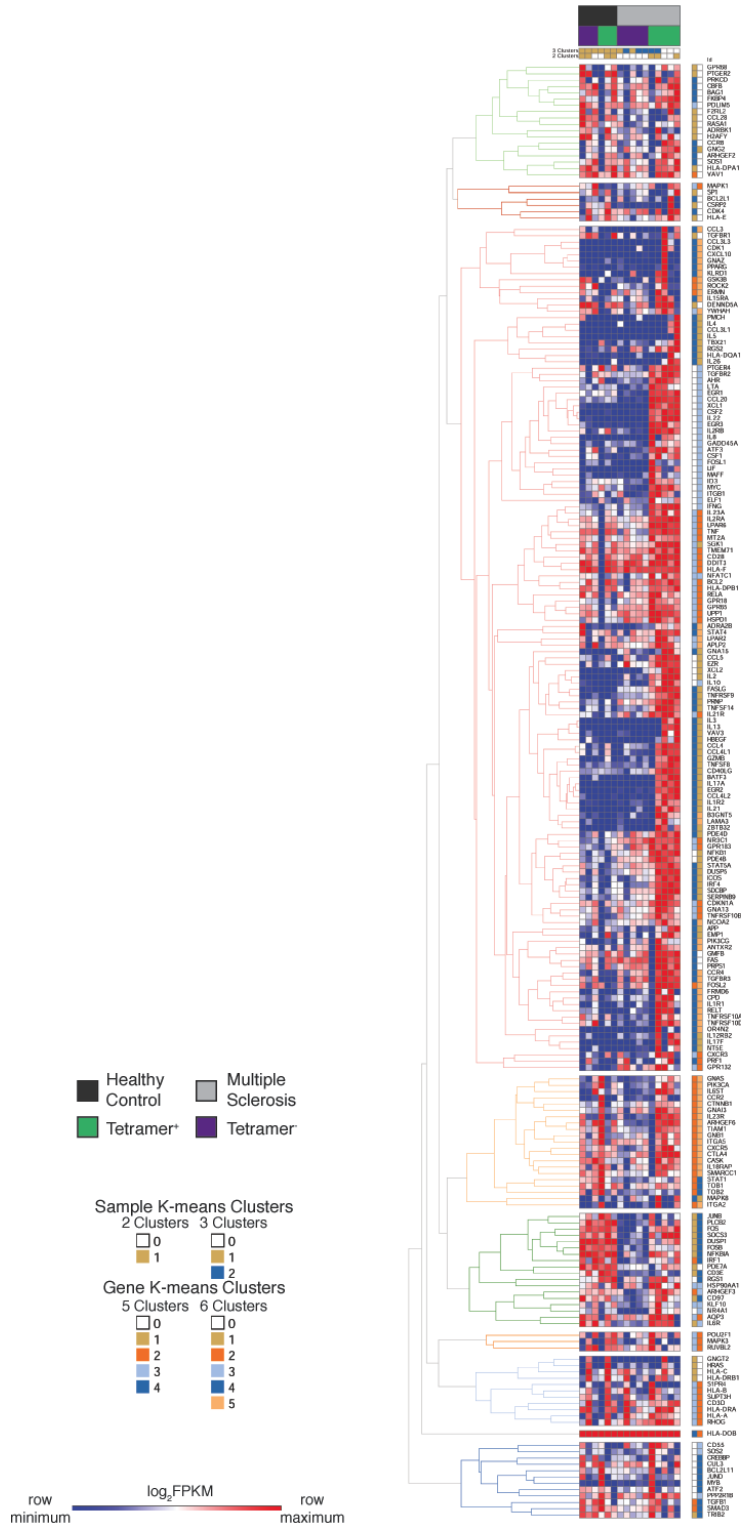

1078 **Fig. S14. Heatmap of log<sub>2</sub>FPKM values for the 224-gene leading edge set.** Data are shown for  
 1079 all samples passing quality control filters. Data were clustered hierarchically (dendrogram) row-  
 1080 wise and by k means for columns (k = 2 and k = 3) and rows (k = 5 and k = 6) using GeneE.



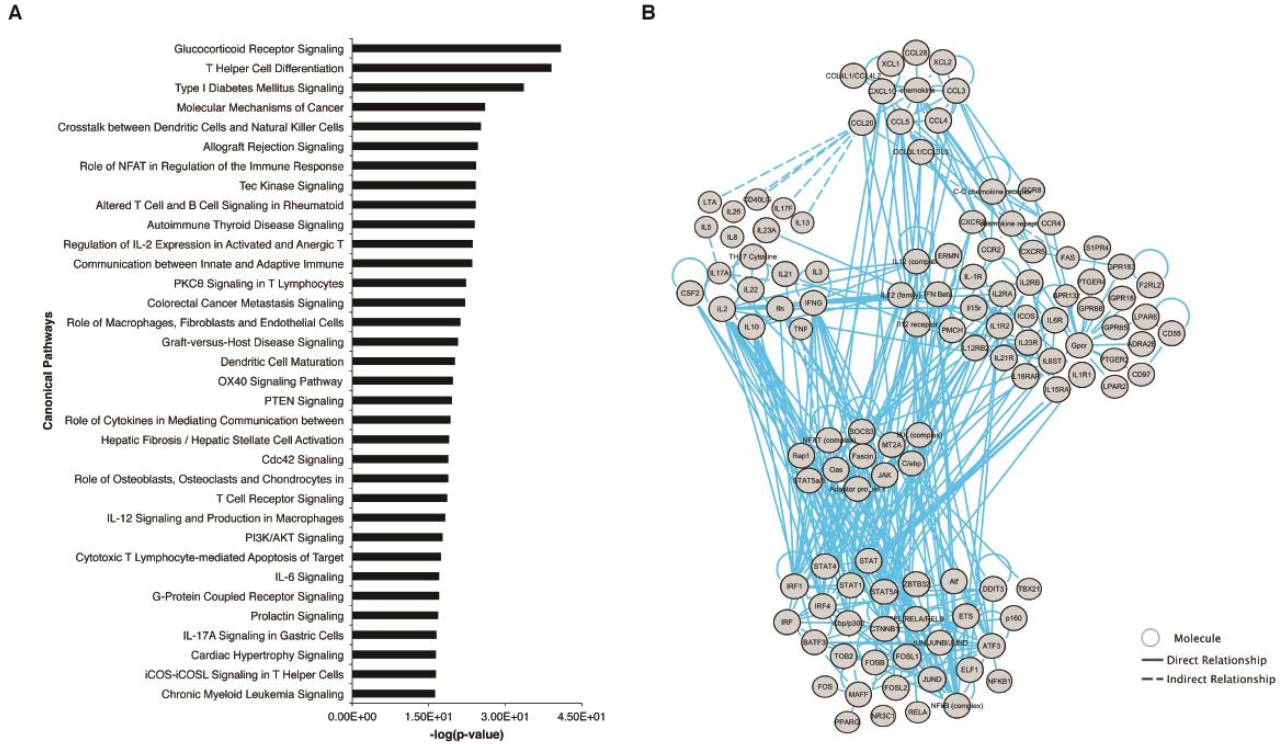

1081  
 1082  
 1083  
 1084  
 1085  
 1086  
 1087  
 1088  
 1089  
 1090  
 1091  
 1092  
 1093

**Fig. S15. Enriched canonical pathways and network analysis.** (A) The top 45 canonical pathways identified as up-regulated in MS tetramer positive samples are plotted as a function of  $-\log(p\text{-value})$ . Canonical pathways were predicted using IPA and the 235-gene signature. (B) Fully labeled version of network diagram presented in figure 4C. Molecules are represented by circles and relationships represented by dashed (indirect) or solid (direct) cyan lines.



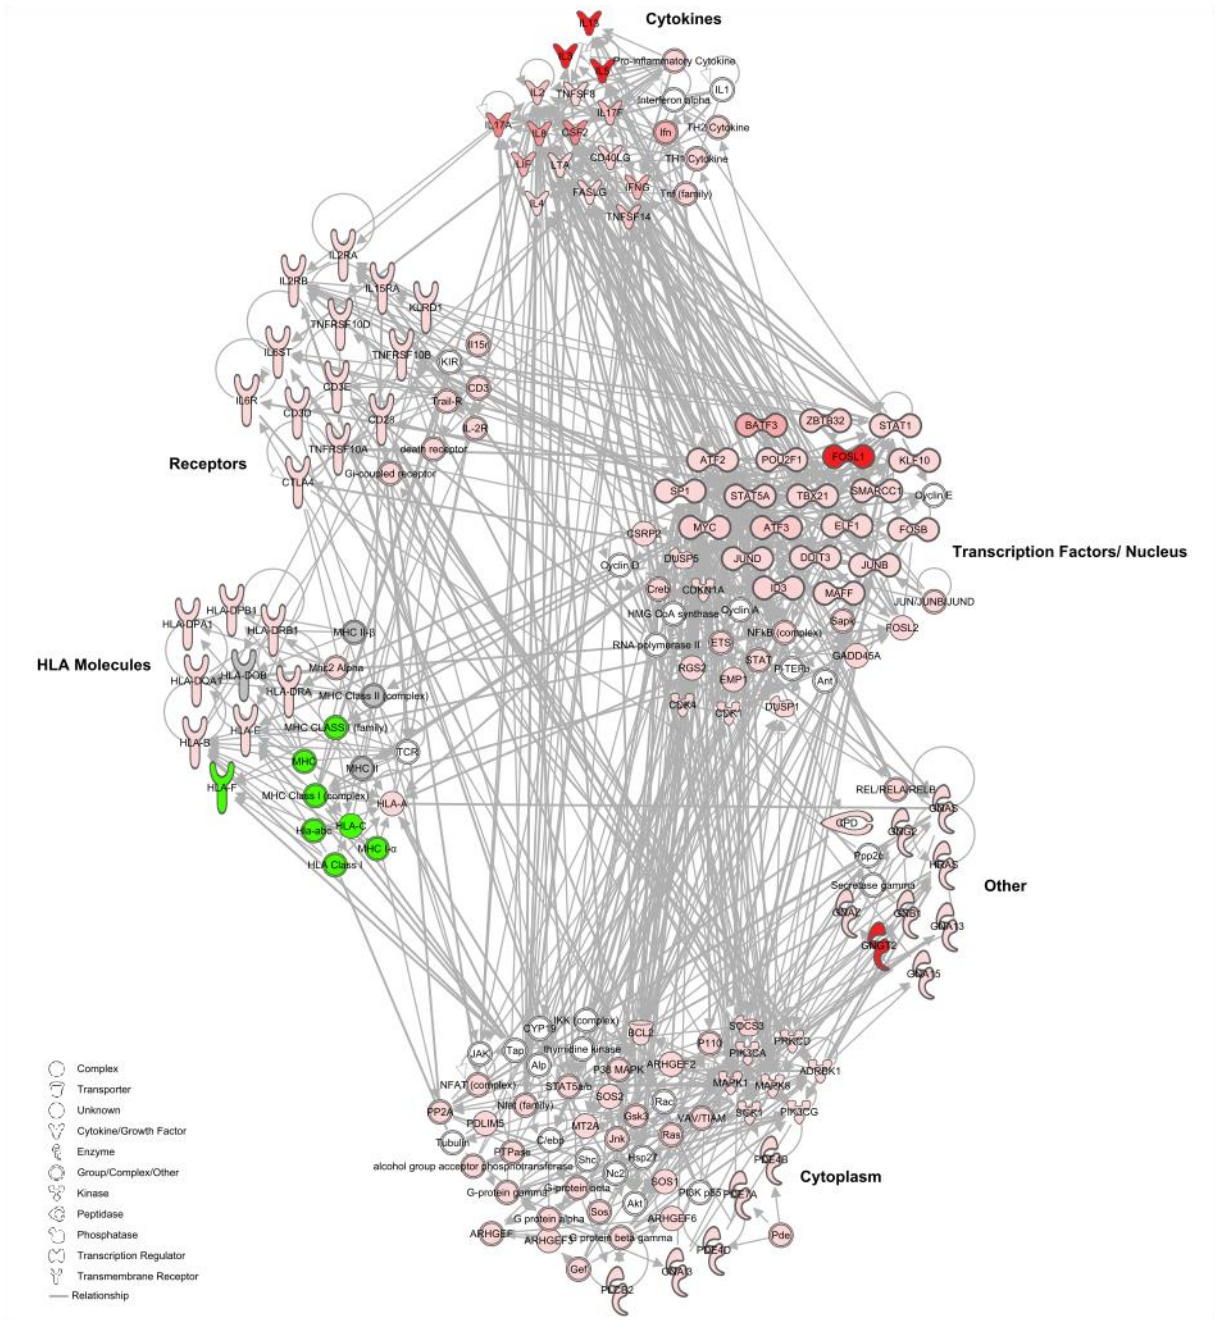

1095  
 1096  
 1097  
 1098  
 1099  
 1100  
 1101  
 1102  
 1103  
 1104

**Fig. S16. Additional network analysis.** Networks 3-7 from IPA were merged and grouped according to molecular function. Molecules are colored according to logFC( $MS^+/MS^-$ ), where red is increased in MS tetramer positive and green in decreased in MS tetramer positive.

**Table S1: Patients with MS and paired healthy subjects Information.**

| Sample ID | Age | Gender | EDSS Score | Date of first Symptoms | Treatment | Experiment used      | T cell libraries generated |                          |                          |
|-----------|-----|--------|------------|------------------------|-----------|----------------------|----------------------------|--------------------------|--------------------------|
|           |     |        |            |                        |           |                      | Naïve                      | CCR6 <sup>-</sup> memory | CCR6 <sup>+</sup> memory |
| MS128     | 35  | F      | 4.0        | 2011                   | Untreated | T cell library assay | 192                        | 192                      | 192                      |
| MS168     | 53  | F      | N.I.       | N.I.                   | Untreated | T cell library assay | 96                         | 96                       | 96                       |
| MS174     | 45  | F      | 1.0        | 2005                   | Untreated | T cell library assay | 96                         | 96                       | 96                       |
| MS176     | 53  | F      | 1.0        | N.I.                   | Untreated | T cell library assay | 96                         | 96                       | 96                       |
| MS189     | 61  | F      | 1.0        | 2007                   | Untreated | T cell library assay | 96                         | 96                       | 96                       |
| MS192     | 33  | M      | 1.0        | 2011                   | Untreated | T cell library assay | 96                         | 96                       | 96                       |
| MS224     | 25  | F      | 1.0        | 2011                   | Untreated | T cell library assay | 96                         | 96                       | 96                       |
| MS226     | 57  | F      | 2.0        | 2011                   | Untreated | T cell library assay | 96                         | 96                       | 96                       |
| MS234     | 20  | F      | 1.0        | 2011                   | Untreated | T cell library assay | 96                         | 96                       | 96                       |
| MS339     | 29  | M      | 1.0        | 2011                   | Untreated | T cell library assay | 96                         | 96                       | 96                       |
| MS464     | 37  | M      | 2.0        | 2014                   | Untreated | T cell library assay | 96                         | 96                       | 192                      |
| MS466     | 51  | F      | 1.0        | 2000                   | Untreated | T cell library assay | 96                         | 96                       | 192                      |
| MS468     | 33  | F      | 2.0        | 2012                   | Untreated | T cell library assay | 96                         | 96                       | 192                      |
| MS470     | 47  | M      | 1.0        | 1995                   | Untreated | T cell library assay | 96                         | 96                       | 192                      |
| MS472     | 32  | F      | 3.0        | 2014                   | Untreated | T cell library assay | 96                         | 96                       | 192                      |
| MS333     | 29  | M      | 1.0        | 2012                   | Untreated | Single cell cloning  | 66                         | 68                       | 192                      |
| MS304     | 39  | M      | 1.0        | 2002                   | Untreated | Single cell cloning  | 0                          | 0                        | 192                      |
| MS361     | 40  | M      | 1.0        | 2013                   | Untreated | Single cell cloning  | 0                          | 0                        | 192                      |
| MS181     | 64  | F      | 6.5        | 2000                   | Untreated | RNA sequencing       | 0                          | 0                        | 192                      |
| MS266     | 57  | F      | 2.0        | 1985                   | Untreated | RNA sequencing       | 0                          | 0                        | 192                      |
| MS386     | 48  | F      | 6.0        | 1994                   | Untreated | RNA sequencing       | 0                          | 0                        | 192                      |
| MS358     | 50  | F      | 1.0        | 2013                   | Untreated | RNA sequencing       | 0                          | 0                        | 192                      |
| MS369     | 43  | M      | 3.0        | 2013                   | Untreated | RNA sequencing       | 0                          | 0                        | 192                      |

1107

**Table S1: Patients with MS and paired healthy subjects Information (continued).**

| Sample ID | Age | Gender | EDSS Score | Date of first Symptoms | Treatment | Experiment used      | T cell libraries generated |                          |                          |
|-----------|-----|--------|------------|------------------------|-----------|----------------------|----------------------------|--------------------------|--------------------------|
|           |     |        |            |                        |           |                      | Naïve                      | CCR6 <sup>-</sup> memory | CCR6 <sup>+</sup> memory |
| HC292     | 31  | M      | N.A.       | N.A.                   | N.A.      | T cell library assay | 192                        | 192                      | 192                      |
| HC304     | 50  | M      | N.A.       | N.A.                   | N.A.      | T cell library assay | 96                         | 96                       | 96                       |
| HC309     | 32  | M      | N.A.       | N.A.                   | N.A.      | T cell library assay | 96                         | 96                       | 96                       |
| HC293     | 25  | F      | N.A.       | N.A.                   | N.A.      | T cell library assay | 96                         | 96                       | 96                       |
| HC326     | 34  | M      | N.A.       | N.A.                   | N.A.      | T cell library assay | 96                         | 96                       | 96                       |
| HC322     | 39  | M      | N.A.       | N.A.                   | N.A.      | T cell library assay | 96                         | 96                       | 96                       |
| HC301     | 27  | F      | N.A.       | N.A.                   | N.A.      | T cell library assay | 96                         | 96                       | 96                       |
| HC310     | 32  | M      | N.A.       | N.A.                   | N.A.      | T cell library assay | 96                         | 96                       | 96                       |
| HC298     | 39  | F      | N.A.       | N.A.                   | N.A.      | T cell library assay | 96                         | 96                       | 96                       |
| HC300     | 54  | F      | N.A.       | N.A.                   | N.A.      | T cell library assay | 96                         | 96                       | 96                       |
| HC2614    | 30  | M      | N.A.       | N.A.                   | N.A.      | T cell library assay | 96                         | 96                       | 192                      |
| HC2623    | 46  | F      | N.A.       | N.A.                   | N.A.      | T cell library assay | 96                         | 96                       | 192                      |
| HC2613    | 22  | F      | N.A.       | N.A.                   | N.A.      | T cell library assay | 96                         | 96                       | 192                      |
| HC2618    | 52  | M      | N.A.       | N.A.                   | N.A.      | T cell library assay | 96                         | 96                       | 192                      |
| HC2622    | 28  | F      | N.A.       | N.A.                   | N.A.      | T cell library assay | 96                         | 96                       | 192                      |
| HC226     | 31  | M      | N.A.       | N.A.                   | N.A.      | Single cell cloning  | 66                         | 68                       | 192                      |
| HC310     | 32  | M      | N.A.       | N.A.                   | N.A.      | Single cell cloning  | 0                          | 0                        | 192                      |
| HC333     | 52  | M      | N.A.       | N.A.                   | N.A.      | Single cell cloning  | 0                          | 0                        | 192                      |
| HC391     | 35  | M      | N.A.       | N.A.                   | N.A.      | RNA sequencing       | 0                          | 0                        | 192                      |
| HC311     | 32  | M      | N.A.       | N.A.                   | N.A.      | RNA sequencing       | 0                          | 0                        | 192                      |
| HC322     | 37  | M      | N.A.       | N.A.                   | N.A.      | RNA sequencing       | 0                          | 0                        | 192                      |
| HC330     | 52  | M      | N.A.       | N.A.                   | N.A.      | RNA sequencing       | 0                          | 0                        | 192                      |

1108

1109 N.I., no information available;

1110 N.A., not applicable.

1111

1112  
 1113  
 1114  
 1115  
 1116

**Table S2. Myelin peptides and control peptides used in T cell library assays.**

| Peptides               | Sequences            | Tetramers                        |
|------------------------|----------------------|----------------------------------|
| MBP <sub>85-99</sub>   | NPVVHFFKNIVTPRT      | DRB1*1501/MBP <sub>85-99</sub>   |
| MOG <sub>222-241</sub> | VALIICYNWLHRRLAGQFLE | DRB1*1501/MOG <sub>222-241</sub> |
| PLP <sub>30-49</sub>   | ALFCGCGHEALTGTEKLIET | DRB1*1501/PLP <sub>30-49</sub>   |
| PLP <sub>129-148</sub> | QHQAHS�ERVCHCLGKWLGH | DRB1*1501/PLP <sub>129-148</sub> |
| MOG <sub>97-109</sub>  | RTELLKDAIGEGK        | DRB1*0401/MOG <sub>97-109</sub>  |
| PLP <sub>180-199</sub> | TWTTCQSIAPSKTSASIGS  | DRB1*0401/PLP <sub>180-199</sub> |
| HA <sub>306-318</sub>  | PRYVKQNTLKLAT        | /                                |
| P24 <sub>166-179</sub> | DRFYKTLRAEQASQ       | /                                |

1117  
 1118  
 1119  
 1120  
 1121  
 1122  
 1123  
 1124  
 1125  
 1126  
 1127  
 1128  
 1129  
 1130  
 1131  
 1132  
 1133  
 1134  
 1135  
 1136  
 1137  
 1138  
 1139  
 1140  
 1141

Abbreviations: MBP, myelin basic protein; MOG, myelin oligodendrocyte glycoprotein; PLP, proteolipid protein; HA, hemagglutinin.

1142  
1143  
1144

**Table S3. Percent variance explained by each principal component.**

| <b>Condition</b> | <i>C. albicans</i>          |                   | <b>No peptide</b>           |                   | <b>Myelin peptides</b>      |                   |
|------------------|-----------------------------|-------------------|-----------------------------|-------------------|-----------------------------|-------------------|
|                  | Naïve/<br>CCR6 <sup>-</sup> | CCR6 <sup>+</sup> | Naïve/<br>CCR6 <sup>-</sup> | CCR6 <sup>+</sup> | Naïve/<br>CCR6 <sup>-</sup> | CCR6 <sup>+</sup> |
| <b>PC1</b>       | 66.91                       | 30.67             | 48.26                       | 33.57             | 58.15                       | 33.16             |
| <b>PC2</b>       | 16.92                       | 23.54             | 27.00                       | 26.66             | 21.58                       | 22.41             |
| <b>PC3</b>       | 12.37                       | 20.68             | 17.77                       | 16.99             | 10.80                       | 21.14             |
| <b>PC4</b>       | 3.48                        | 15.05             | 5.52                        | 12.89             | 8.98                        | 14.64             |
| <b>PC5</b>       | 0.32                        | 10.06             | 1.45                        | 9.89              | 0.49                        | 8.64              |

1145  
1146

1147 **Table S4. GSEA results (FDR < 0.25) for comparison of MS tetramer positive to MS**  
 1148 **tetramer negative.**  
 1149

| NAME                                                                                                           | NES   | NOM p-val | FDR q-val |
|----------------------------------------------------------------------------------------------------------------|-------|-----------|-----------|
| KEGG_CYTOKINE_CYTOKINE_RECEPTOR_INTERACTION                                                                    | 5.255 | <0.001    | <0.001    |
| REACTOME_3_UTR_MEDIATED_TRANSLATIONAL_REGULATION                                                               | 4.418 | <0.001    | <0.001    |
| MIPS_RIBOSOME_CYTOPLASMIC                                                                                      | 4.120 | <0.001    | <0.001    |
| MIPS_NOP56P_ASSOCIATED_PRE_RRNA_COMPLEX                                                                        | 3.941 | <0.001    | <0.001    |
| KEGG_RIBOSOME                                                                                                  | 3.848 | <0.001    | <0.001    |
| REACTOME_PEPTIDE_CHAIN_ELONGATION                                                                              | 3.798 | <0.001    | <0.001    |
| PID_NFAT_TFPATHWAY                                                                                             | 3.797 | <0.001    | <0.001    |
| REACTOME_NONSENSE_MEDIATED_DECAY_ENHANCED_BY_THE_EXON_JUNCTION_COMPLEX                                         | 3.676 | <0.001    | <0.001    |
| BIOCARTA_CYTOKINE_PATHWAY                                                                                      | 3.599 | <0.001    | <0.001    |
| REACTOME_GPCR_LIGAND_BINDING                                                                                   | 3.534 | <0.001    | <0.001    |
| REACTOME_CLASS_A1_RHODOPSIN_LIKE_RECEPTORS                                                                     | 3.497 | <0.001    | <0.001    |
| REACTOME_TRANSLATION                                                                                           | 3.452 | <0.001    | <0.001    |
| REACTOME_ACTIVATION_OF_THE_MRNA_UPON_BINDING_OF_THE_CAP_BINDING_COMPLEX_AND_EIF5_AND_SUBSEQUENT_BINDING_TO_43S | 3.351 | <0.001    | <0.001    |
| PID_API_PATHWAY                                                                                                | 3.319 | <0.001    | <0.001    |
| PID_ATF2_PATHWAY                                                                                               | 3.213 | <0.001    | <0.001    |
| BIOCARTA_INFLAM_PATHWAY                                                                                        | 3.182 | <0.001    | <0.001    |
| REACTOME_INFLUENZA_VIRAL_RNA_TRANSCRIPTION_AND_REPLICATION                                                     | 3.177 | <0.001    | <0.001    |
| MIPS_60S_RIBOSOMAL_SUBUNIT_CYTOPLASMIC                                                                         | 3.158 | <0.001    | <0.001    |
| REACTOME_FORMATION_OF_THE_TERNARY_COMPLEX_AND_SUBSEQUENTLY_THE_43S_COMPLEX                                     | 3.140 | <0.001    | 0.0001    |
| REACTOME_GPCR_DOWNSTREAM_SIGNALING                                                                             | 3.112 | <0.001    | 0.0001    |
| REACTOME_INFLUENZA_LIFE_CYCLE                                                                                  | 3.064 | <0.001    | 0.0001    |
| REACTOME_SIGNALING_BY_GPCR                                                                                     | 3.047 | <0.001    | 0.0001    |
| REACTOME_CHEMOKINE_RECEPTORS_BIND_CHEMOKINES                                                                   | 3.043 | <0.001    | 0.0001    |
| PID_TCR_CALCIUM_PATHWAY                                                                                        | 2.993 | <0.001    | 0.0001    |
| KEGG_CHEMOKINE_SIGNALING_PATHWAY                                                                               | 2.878 | <0.001    | 0.0001    |
| REACTOME_PEPTIDE_LIGAND_BINDING_RECEPTORS                                                                      | 2.874 | <0.001    | 0.0001    |
| KEGG_ASTHMA                                                                                                    | 2.804 | <0.001    | 0.0002    |
| PID_IL23_PATHWAY                                                                                               | 2.790 | <0.001    | 0.0002    |
| KEGG_ALLOGRAFT_REJECTION                                                                                       | 2.772 | <0.001    | 0.0002    |
| PID_REG_GR_PATHWAY                                                                                             | 2.769 | <0.001    | 0.0002    |
| KEGG_AUTOIMMUNE_THYROID_DISEASE                                                                                | 2.707 | <0.001    | 0.0005    |
| REACTOME_METABOLISM_OF_PROTEINS                                                                                | 2.691 | <0.001    | 0.0005    |
| KEGG_MAPK_SIGNALING_PATHWAY                                                                                    | 2.690 | <0.001    | 0.0005    |
| KEGG_JAK_STAT_SIGNALING_PATHWAY                                                                                | 2.663 | <0.001    | 0.0007    |
| BIOCARTA_NKT_PATHWAY                                                                                           | 2.636 | <0.001    | 0.0008    |
| KEGG_TYPE_I_DIABETES_MELLITUS                                                                                  | 2.636 | <0.001    | 0.0008    |
| REACTOME_METABOLISM_OF_RNA                                                                                     | 2.598 | <0.001    | 0.0013    |
| REACTOME_SIGNALING_BY_ILS                                                                                      | 2.583 | <0.001    | 0.0013    |

|                                                                                    |       |        |        |
|------------------------------------------------------------------------------------|-------|--------|--------|
| KEGG_GRAFT_VERSUS_HOST_DISEASE                                                     | 2.579 | <0.001 | 0.0013 |
| MIPS_40S_RIBOSOMAL_SUBUNIT_CYTOPLASMIC                                             | 2.565 | <0.001 | 0.0014 |
| BIOCARTA_MET_PATHWAY                                                               | 2.534 | <0.001 | 0.0018 |
| REACTOME_SLC_MEDIATED_TRANSMEMBRANE_TRANSPORT                                      | 2.505 | <0.001 | 0.0020 |
| BIOCARTA_TFF_PATHWAY                                                               | 2.497 | <0.001 | 0.0021 |
| REACTOME_METABOLISM_OF_MRNA                                                        | 2.493 | <0.001 | 0.0022 |
| BIOCARTA_NTHI_PATHWAY                                                              | 2.484 | <0.001 | 0.0022 |
| KEGG_HEMATOPOIETIC_CELL_LINEAGE                                                    | 2.466 | <0.001 | 0.0025 |
| BIOCARTA_DC_PATHWAY                                                                | 2.462 | <0.001 | 0.0025 |
| PID_MYC_ACTIVPATHWAY                                                               | 2.447 | <0.001 | 0.0028 |
| PID_IL12_2PATHWAY                                                                  | 2.415 | <0.001 | 0.0038 |
| PID_ECADHERIN_STABILIZATION_PATHWAY                                                | 2.396 | <0.001 | 0.0044 |
| PID_IL2_STAT5PATHWAY                                                               | 2.379 | 0.0019 | 0.0051 |
| PID_INTEGRIN1_PATHWAY                                                              | 2.375 | <0.001 | 0.0051 |
| KEGG_PATHWAYS_IN_CANCER                                                            | 2.371 | <0.001 | 0.0053 |
| REACTOME_TRANSPORT_OF_INORGANIC_CATIONS_ANIONS_AND_AMINO_ACIDS_OLIGOPEPTIDES       | 2.365 | 0.0020 | 0.0055 |
| KEGG_SYSTEMIC_LUPUS_ERYTHEMATOSUS                                                  | 2.359 | <0.001 | 0.0056 |
| PID_HIF1_TFPATHWAY                                                                 | 2.343 | 0.0019 | 0.0062 |
| KEGG_T_CELL_RECEPTOR_SIGNALING_PATHWAY                                             | 2.332 | <0.001 | 0.0064 |
| KEGG_SMALL_CELL_LUNG_CANCER                                                        | 2.305 | 0.0020 | 0.0077 |
| BIOCARTA_AKT_PATHWAY                                                               | 2.272 | 0.0019 | 0.0095 |
| REACTOME_PLATELET_ACTIVATION_SIGNALING_AND_AGGREGATION                             | 2.270 | 0.0060 | 0.0094 |
| MIPS_EIF3_COMPLEX                                                                  | 2.265 | <0.001 | 0.0097 |
| MIPS_CHUK_NFKB2_REL_IKBKG_SPAG9_NFKB1_NFKBIE_COPB2_TNIP1_NFKBIA_RELA_TNIP2_COMPLEX | 2.264 | <0.001 | 0.0096 |
| BIOCARTA_GCR_PATHWAY                                                               | 2.211 | 0.0020 | 0.0141 |
| REACTOME_CYTOKINE_SIGNALING_IN_IMMUNE_SYSTEM                                       | 2.209 | 0.0019 | 0.0140 |
| PID_AVB3_OPN_PATHWAY                                                               | 2.207 | <0.001 | 0.0140 |
| KEGG_ADHERENS_JUNCTION                                                             | 2.191 | <0.001 | 0.0154 |
| KEGG_SPLICEOSOME                                                                   | 2.187 | 0.0020 | 0.0156 |
| PID_IL6_7PATHWAY                                                                   | 2.183 | <0.001 | 0.0157 |
| PID_PDGFBRBPATHWAY                                                                 | 2.173 | 0.0020 | 0.0165 |
| PID_CD8TCRDOWNSTREAMPATHWAY                                                        | 2.170 | 0.0058 | 0.0165 |
| REACTOME_G_ALPHA_I_SIGNALLING_EVENTS                                               | 2.166 | <0.001 | 0.0166 |
| PID_AJDISS_2PATHWAY                                                                | 2.159 | 0.0020 | 0.0170 |
| PID_NFKAPPABCANONICALPATHWAY                                                       | 2.156 | 0.0062 | 0.0171 |
| KEGG_REGULATION_OF_ACTIN_CYTOSKELETON                                              | 2.143 | 0.0019 | 0.0185 |
| BIOCARTA_IGF1_PATHWAY                                                              | 2.139 | <0.001 | 0.0188 |
| KEGG_INTESTINAL_IMMUNE_NETWORK_FOR_IGA_PRODUCTION                                  | 2.134 | <0.001 | 0.0191 |
| PID_IL12_STAT4PATHWAY                                                              | 2.130 | 0.0038 | 0.0194 |
| MIPS_TRBP_CONTAINING_COMPLEX_1                                                     | 2.115 | 0.0019 | 0.0213 |
| PID_IL2_1PATHWAY                                                                   | 2.114 | <0.001 | 0.0211 |
| MIPS_17S_U2_SNRNP                                                                  | 2.109 | 0.0020 | 0.0218 |

|                                                                            |       |        |        |
|----------------------------------------------------------------------------|-------|--------|--------|
| BIOCARTA_IL2RB_PATHWAY                                                     | 2.104 | 0.0042 | 0.0220 |
| KEGG_ANTIGEN_PROCESSING_AND_PRESENTATION                                   | 2.104 | <0.001 | 0.0219 |
| PID_ANGIOPOIETINRECEPTOR_PATHWAY                                           | 2.102 | 0.0020 | 0.0217 |
| PID_ER_NONGENOMIC_PATHWAY                                                  | 2.101 | <0.001 | 0.0215 |
| PID_SYNDECAN_2_PATHWAY                                                     | 2.099 | 0.0020 | 0.0215 |
| REACTOME_AMINO_ACID_AND_OLIGOPEPTIDE_SLC_TRANSPORTERS                      | 2.089 | 0.0021 | 0.0228 |
| KEGG_ECM_RECEPTOR_INTERACTION                                              | 2.089 | <0.001 | 0.0226 |
| KEGG_NOD_LIKE_RECEPTOR_SIGNALING_PATHWAY                                   | 2.082 | 0.0039 | 0.0233 |
| BIOCARTA_TOB1_PATHWAY                                                      | 2.079 | <0.001 | 0.0234 |
| PID_CD40_PATHWAY                                                           | 2.075 | 0.0038 | 0.0238 |
| KEGG_CHRONIC_MYELOID_LEUKEMIA                                              | 2.073 | 0.0019 | 0.0239 |
| MIPS_TNF_ALPHA_NF_KAPPA_B_SIGNALING_COMPLEX                                | 2.072 | 0.0041 | 0.0238 |
| PID_REELINPATHWAY                                                          | 2.071 | 0.0019 | 0.0236 |
| PID_P53REGULATIONPATHWAY                                                   | 2.066 | <0.001 | 0.0242 |
| SIG_CD40PATHWAYMAP                                                         | 2.066 | 0.0019 | 0.0240 |
| PID_KITPATHWAY                                                             | 2.052 | 0.0040 | 0.0258 |
| BIOCARTA_INSULIN_PATHWAY                                                   | 2.050 | 0.0102 | 0.0261 |
| PID_EPOPATHWAY                                                             | 2.049 | 0.0020 | 0.0259 |
| REACTOME_GROWTH_HORMONE_RECEPTOR_SIGNALING                                 | 2.030 | 0.0020 | 0.0292 |
| PID_TELOMERASEPATHWAY                                                      | 2.027 | 0.0020 | 0.0295 |
| REACTOME_HEMOSTASIS                                                        | 2.026 | 0.0039 | 0.0294 |
| KEGG_NATURAL_KILLER_CELL_MEDIATED_CYTOTOXICITY                             | 2.023 | 0.0020 | 0.0296 |
| PID_ERBB1_RECEPTOR_PROXIMAL_PATHWAY                                        | 2.022 | 0.0020 | 0.0295 |
| KEGG_TYPE_II_DIABETES_MELLITUS                                             | 2.016 | 0.0061 | 0.0306 |
| PID_IL27PATHWAY                                                            | 2.013 | 0.0126 | 0.0310 |
| KEGG_FOCAL_ADHESION                                                        | 2.011 | 0.0062 | 0.0314 |
| KEGG_RIG_I_LIKE_RECEPTOR_SIGNALING_PATHWAY                                 | 2.005 | 0.0063 | 0.0320 |
| KEGG_FC_EPSILON_RI_SIGNALING_PATHWAY                                       | 2.005 | 0.0059 | 0.0319 |
| REACTOME_AXON_GUIDANCE                                                     | 2.003 | 0.0038 | 0.0319 |
| PID_SHP2_PATHWAY                                                           | 2.002 | 0.0040 | 0.0318 |
| PID_FRA_PATHWAY                                                            | 1.998 | 0.0105 | 0.0322 |
| PID_AVB3_INTEGRIN_PATHWAY                                                  | 1.994 | 0.0058 | 0.0329 |
| BIOCARTA_NFAT_PATHWAY                                                      | 1.986 | 0.0039 | 0.0339 |
| BIOCARTA_41BB_PATHWAY                                                      | 1.986 | 0.0042 | 0.0336 |
| KEGG_TOLL_LIKE_RECEPTOR_SIGNALING_PATHWAY                                  | 1.966 | 0.0019 | 0.0375 |
| KEGG_ARGININE_AND_PROLINE_METABOLISM                                       | 1.963 | 0.0062 | 0.0378 |
| REACTOME_NFKB_AND_MAP_KINASES_ACTIVATION_MEDIATED_BY_TLR4_SIGNALING_REPEAT | 1.958 | 0.0059 | 0.0385 |
| REACTOME_IL_3_5_AND_GM-CSF_SIGNALING                                       | 1.958 | 0.0079 | 0.0383 |
| REACTOME_TRIGLYCERIDE_BIOSYNTHESIS                                         | 1.955 | 0.0104 | 0.0385 |
| KEGG_LEISHMANIA_INFECTION                                                  | 1.954 | 0.0039 | 0.0385 |
| REACTOME_MYD88_MAL_CASCADE_INITIATED_ON_PLASMA_MEMBRANE                    | 1.945 | 0.0120 | 0.0406 |
| REACTOME_TRANSPORT_OF_MATURE_TRANSCRIPT_TO_CYTOPLASM                       | 1.933 | 0.0108 | 0.0430 |



|                                                                                                   |       |        |        |
|---------------------------------------------------------------------------------------------------|-------|--------|--------|
| PID_LYSOPHOSPHOLIPID_PATHWAY                                                                      | 1.932 | 0.0084 | 0.0427 |
| BIOCARTA_PPARA_PATHWAY                                                                            | 1.928 | 0.0141 | 0.0435 |
| REACTOME_TAK1_ACTIVATES_NFKB_BY_PHOSPHORYLATION_AND_ACTIVATION_OF_IKKS_COMPLEX                    | 1.927 | 0.0173 | 0.0435 |
| BIOCARTA_EIF_PATHWAY                                                                              | 1.925 | 0.0078 | 0.0436 |
| PID_RHOA_PATHWAY                                                                                  | 1.923 | 0.0060 | 0.0436 |
| BIOCARTA_IL1R_PATHWAY                                                                             | 1.920 | 0.0058 | 0.0441 |
| PID_BCR_5PATHWAY                                                                                  | 1.904 | 0.0122 | 0.0485 |
| MIPS_LARGE_DROSHA_COMPLEX                                                                         | 1.901 | 0.0079 | 0.0489 |
| PID_SYNDECAN_4_PATHWAY                                                                            | 1.899 | 0.0082 | 0.0490 |
| REACTOME_TRANSMEMBRANE_TRANSPORT_OF_SMALL_MOLECULES                                               | 1.892 | 0.0081 | 0.0507 |
| BIOCARTA_BAD_PATHWAY                                                                              | 1.891 | 0.0134 | 0.0505 |
| PID_ERBB1_DOWNSTREAM_PATHWAY                                                                      | 1.889 | 0.0081 | 0.0506 |
| REACTOME_MAP_KINASE_ACTIVATION_IN_TLR_CASCADE                                                     | 1.888 | 0.0064 | 0.0507 |
| REACTOME_G_ALPHA_Q_SIGNALLING_EVENTS                                                              | 1.884 | 0.0065 | 0.0513 |
| PID_AR_TF_PATHWAY                                                                                 | 1.880 | 0.0156 | 0.0519 |
| REACTOME_MRNA_PROCESSING                                                                          | 1.878 | 0.0099 | 0.0523 |
| PID_IGF1_PATHWAY                                                                                  | 1.877 | 0.0141 | 0.0521 |
| SIG_INSULIN_RECEPTOR_PATHWAY_IN_CARDIAC_MYOCYTES                                                  | 1.876 | 0.0134 | 0.0522 |
| KEGG_B_CELL_RECEPTOR_SIGNALING_PATHWAY                                                            | 1.870 | 0.0039 | 0.0535 |
| REACTOME_INNATE_IMMUNE_SYSTEM                                                                     | 1.865 | 0.0098 | 0.0547 |
| KEGG_PROSTATE_CANCER                                                                              | 1.863 | 0.0100 | 0.0551 |
| PID_FAK_PATHWAY                                                                                   | 1.862 | 0.0143 | 0.0548 |
| REACTOME_RESPONSE_TO_ELEVATED_PLATELET_CYTOSOLIC_CA2_                                             | 1.854 | 0.0121 | 0.0571 |
| REACTOME_ACTIVATED_TLR4_SIGNALLING                                                                | 1.848 | 0.0106 | 0.0588 |
| BIOCARTA_TH1TH2_PATHWAY                                                                           | 1.848 | 0.0103 | 0.0584 |
| BIOCARTA_ASBCCELL_PATHWAY                                                                         | 1.843 | 0.0039 | 0.0597 |
| REACTOME_PROCESSING_OF_CAPPED_INTRON_CONTAINING_PRE_MRNA                                          | 1.843 | 0.0078 | 0.0594 |
| PID_IL4_2PATHWAY                                                                                  | 1.841 | 0.0099 | 0.0598 |
| REACTOME_TRAF6_MEDIATED_INDUCION_OF_NFKB_AND_MAP_KINASES_UPON_TLR7_8_OR_9_ACTIVATION              | 1.839 | 0.0243 | 0.0599 |
| PID_TCPTP_PATHWAY                                                                                 | 1.833 | 0.0138 | 0.0613 |
| REACTOME_IL_RECEPTOR_SHC_SIGNALING                                                                | 1.831 | 0.0121 | 0.0618 |
| KEGG_VIRAL_MYOCARDITIS                                                                            | 1.816 | 0.0158 | 0.0664 |
| REACTOME_CELL_SURFACE_INTERACTIONS_AT_THE_VASCULAR_WALL                                           | 1.808 | 0.0183 | 0.0692 |
| ST_INTEGRIN_SIGNALING_PATHWAY                                                                     | 1.808 | 0.0104 | 0.0688 |
| REACTOME_CYTOSOLIC_TRNA_AMINOACYLATION                                                            | 1.806 | 0.0178 | 0.0688 |
| BIOCARTA_GSK3_PATHWAY                                                                             | 1.799 | 0.0247 | 0.0711 |
| PID_IL2_PI3KPATHWAY                                                                               | 1.790 | 0.0117 | 0.0743 |
| REACTOME_GASTRIN_CREB_SIGNALLING_PATHWAY_VIA_PKC_AND_MAPK                                         | 1.788 | 0.0144 | 0.0749 |
| REACTOME_NUCLEOTIDE_BINDING_DOMAIN_LEUCINE_RICH_REPEAT_CONTAINING_RECEPTOR_NLR_SIGNALING_PATHWAYS | 1.786 | 0.0177 | 0.0753 |
| REACTOME_CLEAVAGE_OF_GROWING_TRANSCRIPT_IN_THE_TERMINATION_REGION_                                | 1.785 | 0.0253 | 0.0752 |
| REACTOME_G_ALPHA1213_SIGNALLING_EVENTS                                                            | 1.785 | 0.0139 | 0.0748 |
| MIPS_SPLICEOSOME                                                                                  | 1.785 | 0.0208 | 0.0744 |

|                                                                                            |       |        |        |
|--------------------------------------------------------------------------------------------|-------|--------|--------|
| KEGG_BLADDER_CANCER                                                                        | 1.779 | 0.0118 | 0.0764 |
| PID_CDC42_PATHWAY                                                                          | 1.778 | 0.0223 | 0.0762 |
| REACTOME_TRIF_MEDIATED_TLR3_SIGNALING                                                      | 1.777 | 0.0255 | 0.0760 |
| PID_TRKRPATHWAY                                                                            | 1.759 | 0.0241 | 0.0835 |
| BIOCARTA_CTLA4_PATHWAY                                                                     | 1.757 | 0.0137 | 0.0840 |
| BIOCARTA_HER2_PATHWAY                                                                      | 1.751 | 0.0230 | 0.0862 |
| BIOCARTA_GATA3_PATHWAY                                                                     | 1.746 | 0.0249 | 0.0880 |
| BIOCARTA_ATM_PATHWAY                                                                       | 1.745 | 0.0224 | 0.0879 |
| REACTOME_BASIGIN_INTERACTIONS                                                              | 1.743 | 0.0158 | 0.0881 |
| KEGG_NEUROTROPHIN_SIGNALING_PATHWAY                                                        | 1.742 | 0.0230 | 0.0880 |
| KEGG_P53_SIGNALING_PATHWAY                                                                 | 1.738 | 0.0173 | 0.0895 |
| KEGG_ARRHYTHMOGENIC_RIGHT_VENTRICULAR_CARDIOMYOPATHY_ARVC                                  | 1.737 | 0.0182 | 0.0893 |
| BIOCARTA_CD40_PATHWAY                                                                      | 1.737 | 0.0209 | 0.0892 |
| REACTOME_JNK_C_JUN_KINASES_PHOSPHORYLATION_AND_ACTIVATION_MEDIATED_BY_ACTIVATED_HUMAN_TAK1 | 1.734 | 0.0177 | 0.0897 |
| REACTOME_TOLL_RECEPTOR_CASCADES                                                            | 1.732 | 0.0207 | 0.0905 |
| KEGG_PATHOGENIC_ESCHERICHIA_COLI_INFECTION                                                 | 1.729 | 0.0195 | 0.0912 |
| BIOCARTA_P53HYPOXIA_PATHWAY                                                                | 1.724 | 0.0280 | 0.0927 |
| PID_CIRCADIANPATHWAY                                                                       | 1.721 | 0.0181 | 0.0940 |
| BIOCARTA_PTDINS_PATHWAY                                                                    | 1.719 | 0.0321 | 0.0941 |
| MIPS_TNF_ALPHA_NF_KAPPA_B_SIGNALING_COMPLEX_3                                              | 1.705 | 0.0327 | 0.1007 |
| PID_GMCSF_PATHWAY                                                                          | 1.705 | 0.0290 | 0.1002 |
| ST_PHOSPHOINOSITIDE_3_KINASE_PATHWAY                                                       | 1.692 | 0.0195 | 0.1060 |
| REACTOME_FORMATION_OF_TUBULIN_FOLDING_INTERMEDIATES_BY_CCT_TRIC                            | 1.688 | 0.0298 | 0.1076 |
| PID_CXCR4_PATHWAY                                                                          | 1.687 | 0.0261 | 0.1076 |
| BIOCARTA_RANKL_PATHWAY                                                                     | 1.679 | 0.0342 | 0.1114 |
| PID_THROMBIN_PAR1_PATHWAY                                                                  | 1.675 | 0.0408 | 0.1130 |
| BIOCARTA_IL6_PATHWAY                                                                       | 1.673 | 0.0351 | 0.1133 |
| REACTOME_PLATELET_AGGREGATION_PLUG_FORMATION                                               | 1.673 | 0.0192 | 0.1131 |
| REACTOME_MRNA_SPLICING                                                                     | 1.671 | 0.0395 | 0.1133 |
| ST_T_CELL_SIGNAL_TRANSDUCTION                                                              | 1.671 | 0.0329 | 0.1130 |
| KEGG_PANCREATIC_CANCER                                                                     | 1.671 | 0.0370 | 0.1125 |
| BIOCARTA_TALL1_PATHWAY                                                                     | 1.667 | 0.0348 | 0.1136 |
| PID_RET_PATHWAY                                                                            | 1.659 | 0.0235 | 0.1173 |
| PID_VEGFR1_2_PATHWAY                                                                       | 1.652 | 0.0439 | 0.1209 |
| REACTOME_NCAM_SIGNALING_FOR_NEURITE_OUT_GROWTH                                             | 1.652 | 0.0308 | 0.1206 |
| KEGG_HYPERTROPHIC_CARDIOMYOPATHY_HCM                                                       | 1.651 | 0.0381 | 0.1204 |
| REACTOME_IL_2_SIGNALING                                                                    | 1.651 | 0.0416 | 0.1200 |
| PID_AR_NONGENOMIC_PATHWAY                                                                  | 1.649 | 0.0375 | 0.1201 |
| ST_B_CELL_ANTIGEN_RECEPTOR                                                                 | 1.647 | 0.0371 | 0.1210 |
| BIOCARTA_RACCYCD_PATHWAY                                                                   | 1.642 | 0.0304 | 0.1237 |
| REACTOME_CLASS_B_2_SECRETIN_FAMILY_RECEPTORS                                               | 1.633 | 0.0359 | 0.1285 |
| REACTOME_PERK_REGULATED_GENE_EXPRESSION                                                    | 1.624 | 0.0475 | 0.1336 |

|                                                                  |       |        |        |
|------------------------------------------------------------------|-------|--------|--------|
| PID_INSULIN_GLUKOSE_PATHWAY                                      | 1.624 | 0.0372 | 0.1331 |
| PID_CERAMIDE_PATHWAY                                             | 1.621 | 0.0498 | 0.1343 |
| PID_NCADHERINPATHWAY                                             | 1.620 | 0.0428 | 0.1346 |
| SIG_REGULATION_OF_THE_ACTIN_CYTOSKELETON_BY_RHO_GTPASES          | 1.617 | 0.0493 | 0.1358 |
| REACTOME_DEVELOPMENTAL_BIOLOGY                                   | 1.615 | 0.0432 | 0.1361 |
| MIPS_DGCR8_MULTIPROTEIN_COMPLEX                                  | 1.608 | 0.0505 | 0.1402 |
| REACTOME_ACTIVATED_TAK1_MEDIATES_P38_MAPK_ACTIVATION             | 1.603 | 0.0589 | 0.1431 |
| BIOCARTA_IL3_PATHWAY                                             | 1.599 | 0.0503 | 0.1447 |
| ST_ERK1_ERK2_MAPK_PATHWAY                                        | 1.599 | 0.0397 | 0.1441 |
| PID_IL8CXCR1_PATHWAY                                             | 1.599 | 0.0443 | 0.1437 |
| BIOCARTA_HSP27_PATHWAY                                           | 1.598 | 0.0367 | 0.1436 |
| PID_ARF6DOWNSTREAMPATHWAY                                        | 1.593 | 0.0521 | 0.1465 |
| BIOCARTA_TNFR2_PATHWAY                                           | 1.588 | 0.0306 | 0.1493 |
| PID_THROMBIN_PAR4_PATHWAY                                        | 1.587 | 0.0614 | 0.1488 |
| PID_LYMPHANGIOGENESIS_PATHWAY                                    | 1.583 | 0.0581 | 0.1511 |
| KEGG_GAP_JUNCTION                                                | 1.582 | 0.0619 | 0.1513 |
| REACTOME_ACTIVATION_OF_CHAPERONES_BY_ATF6_ALPHA                  | 1.581 | 0.0472 | 0.1515 |
| BIOCARTA_CDMAC_PATHWAY                                           | 1.576 | 0.0535 | 0.1542 |
| BIOCARTA_GLEEVEC_PATHWAY                                         | 1.576 | 0.0339 | 0.1539 |
| REACTOME_IMMUNE_SYSTEM                                           | 1.564 | 0.0469 | 0.1621 |
| BIOCARTA_CREB_PATHWAY                                            | 1.563 | 0.0477 | 0.1625 |
| ST_GA13_PATHWAY                                                  | 1.560 | 0.0581 | 0.1636 |
| REACTOME_NOD1_2_SIGNALING_PATHWAY                                | 1.558 | 0.0531 | 0.1649 |
| REACTOME_MRNA_3_END_PROCESSING                                   | 1.557 | 0.0373 | 0.1643 |
| BIOCARTA_AGR_PATHWAY                                             | 1.557 | 0.0639 | 0.1638 |
| BIOCARTA_MAPK_PATHWAY                                            | 1.556 | 0.0593 | 0.1641 |
| REACTOME_TRANSPORT_TO_THE_GOLGI_AND_SUBSEQUENT_MODIFICATION      | 1.550 | 0.0536 | 0.1679 |
| PID_EPHA2_FWDPATHWAY                                             | 1.550 | 0.0435 | 0.1674 |
| REACTOME_G_ALPHA_S_SIGNALLING_EVENTS                             | 1.549 | 0.0509 | 0.1670 |
| PID_FGF_PATHWAY                                                  | 1.548 | 0.0663 | 0.1672 |
| BIOCARTA_ALK_PATHWAY                                             | 1.543 | 0.0631 | 0.1704 |
| REACTOME_RIG_I_MDA5_MEDIATED_INDUCION_OF_IFN_ALPHA_BETA_PATHWAYS | 1.540 | 0.0635 | 0.1724 |
| MIPS_KINASE_MATURATION_COMPLEX_1                                 | 1.534 | 0.0781 | 0.1759 |
| PID_INTEGRIN_A4B1_PATHWAY                                        | 1.533 | 0.0507 | 0.1766 |
| REACTOME_GLUKOSE_TRANSPORT                                       | 1.529 | 0.0586 | 0.1788 |
| MIPS_CDC5L_COMPLEX                                               | 1.524 | 0.0744 | 0.1819 |
| BIOCARTA_TPO_PATHWAY                                             | 1.517 | 0.0774 | 0.1871 |
| KEGG_RENAL_CELL_CARCINOMA                                        | 1.513 | 0.0830 | 0.1898 |
| BIOCARTA_ECM_PATHWAY                                             | 1.509 | 0.0597 | 0.1923 |
| BIOCARTA_ARF_PATHWAY                                             | 1.508 | 0.0758 | 0.1920 |
| PID_CD8TCRPATHWAY                                                | 1.508 | 0.0669 | 0.1913 |
| PID_MAPKTRKPATHWAY                                               | 1.507 | 0.0553 | 0.1912 |
| BIOCARTA_RNA_PATHWAY                                             | 1.507 | 0.0646 | 0.1906 |

|                                                                          |       |        |        |
|--------------------------------------------------------------------------|-------|--------|--------|
| PID_LKB1_PATHWAY                                                         | 1.507 | 0.0593 | 0.1903 |
| PID_ECADHERIN_NASCENTAJ_PATHWAY                                          | 1.505 | 0.0762 | 0.1910 |
| BIOCARTA_MPR_PATHWAY                                                     | 1.503 | 0.0752 | 0.1920 |
| REACTOME_INTEGRIN_ALPHAIIIB_BETA3_SIGNALING                              | 1.498 | 0.0679 | 0.1952 |
| PID_MET_PATHWAY                                                          | 1.494 | 0.0827 | 0.1985 |
| MIPS_HCF_1_COMPLEX                                                       | 1.493 | 0.0676 | 0.1984 |
| PID_A6B1_A6B4_INTEGRIN_PATHWAY                                           | 1.492 | 0.0777 | 0.1989 |
| PID_NFAT_3PATHWAY                                                        | 1.488 | 0.0955 | 0.2018 |
| BIOCARTA_IGFIR_PATHWAY                                                   | 1.478 | 0.0738 | 0.2093 |
| BIOCARTA_ETS_PATHWAY                                                     | 1.475 | 0.0774 | 0.2116 |
| PID_NETRIN_PATHWAY                                                       | 1.472 | 0.0864 | 0.2138 |
| REACTOME_TRNA_AMINOACYLATION                                             | 1.471 | 0.0823 | 0.2130 |
| BIOCARTA_ERK_PATHWAY                                                     | 1.469 | 0.0929 | 0.2144 |
| REACTOME_L1CAM_INTERACTIONS                                              | 1.469 | 0.0720 | 0.2140 |
| REACTOME_PROLONGED_ERK_ACTIVATION_EVENTS                                 | 1.466 | 0.1004 | 0.2154 |
| BIOCARTA_PDGF_PATHWAY                                                    | 1.465 | 0.0857 | 0.2152 |
| PID_PI3KPLCTRKPATWAY                                                     | 1.465 | 0.0630 | 0.2147 |
| REACTOME_AMYLOIDS                                                        | 1.464 | 0.0918 | 0.2144 |
| PID_P53DOWNSTREAMPATHWAY                                                 | 1.459 | 0.0829 | 0.2191 |
| KEGG_DILATED_CARDIOMYOPATHY                                              | 1.455 | 0.0984 | 0.2218 |
| REACTOME_GLYCOLYSIS                                                      | 1.454 | 0.0761 | 0.2224 |
| REACTOME_RNA_POL_I_PROMOTER_OPENING                                      | 1.454 | 0.0923 | 0.2217 |
| PID_IL1PATHWAY                                                           | 1.452 | 0.0812 | 0.2231 |
| PID_ECADHERIN_KERATINOCYTE_PATHWAY                                       | 1.451 | 0.1143 | 0.2224 |
| REACTOME_MAPK_TARGETS_NUCLEAR_EVENTS_MEDIATED_BY_MAP_KINASES             | 1.451 | 0.0822 | 0.2216 |
| REACTOME_ACTIVATION_OF_GENES_BY_ATF4                                     | 1.451 | 0.0873 | 0.2213 |
| PID_IL8CXCR2_PATHWAY                                                     | 1.450 | 0.1075 | 0.2216 |
| BIOCARTA_IL2_PATHWAY                                                     | 1.445 | 0.1091 | 0.2252 |
| REACTOME_NRAGE_SIGNALS_DEATH_THROUGH_JNK                                 | 1.443 | 0.0870 | 0.2261 |
| REACTOME_THROMBIN_SIGNALLING_THROUGH_PROTEINASE_ACTIVATED_RECEPTORS_PARS | 1.442 | 0.0780 | 0.2268 |
| REACTOME_IL1_SIGNALING                                                   | 1.438 | 0.1025 | 0.2295 |
| REACTOME_TRANSPORT_OF_MATURE_MRNA_DERIVED_FROM_AN_INTRONLESS_TRANSCRIPT  | 1.437 | 0.1020 | 0.2302 |
| BIOCARTA_INTEGRIN_PATHWAY                                                | 1.431 | 0.0976 | 0.2350 |
| MIPS_TNF_ALPHA_NF_KAPPA_B_SIGNALING_COMPLEX_6                            | 1.429 | 0.0958 | 0.2356 |
| REACTOME_DOWNSTREAM_TCR_SIGNALING                                        | 1.427 | 0.1029 | 0.2369 |
| ST_P38_MAPK_PATHWAY                                                      | 1.426 | 0.1010 | 0.2364 |
| PID_IFNGPATHWAY                                                          | 1.426 | 0.0911 | 0.2362 |
| BIOCARTA_PARI_PATHWAY                                                    | 1.425 | 0.1036 | 0.2357 |
| KEGG_AMINOACYL_TRNA_BIOSYNTHESIS                                         | 1.423 | 0.1018 | 0.2370 |
| KEGG_EPITHELIAL_CELL_SIGNALING_IN_HELICOBACTER_PYLORI_INFECTION          | 1.420 | 0.0937 | 0.2395 |
| ST_DIFFERENTIATION_PATHWAY_IN_PC12_CELLS                                 | 1.419 | 0.1086 | 0.2394 |
| PID_SMAD2_3NUCLEARPATHWAY                                                | 1.417 | 0.1033 | 0.2400 |

|                                                                                   |       |        |        |
|-----------------------------------------------------------------------------------|-------|--------|--------|
| BIOCARTA_TCR_PATHWAY                                                              | 1.414 | 0.0961 | 0.2424 |
| BIOCARTA_KERATINOCYTE_PATHWAY                                                     | 1.414 | 0.0984 | 0.2416 |
| BIOCARTA_NKCELLS_PATHWAY                                                          | 1.413 | 0.1130 | 0.2413 |
| REACTOME_ANTIGEN_PRESENTATION_FOLDING_ASSEMBLY_AND_PEPTIDE_LOADING_OF_CLASS_I_MHC | 1.412 | 0.1083 | 0.2419 |
| PID_S1P_S1P4_PATHWAY                                                              | 1.410 | 0.1022 | 0.2431 |
| REACTOME_INTERFERON_GAMMA_SIGNALING                                               | 1.405 | 0.1040 | 0.2473 |
| MIPS_TNF_ALPHA_NF_KAPPA_B_SIGNALING_COMPLEX_5                                     | 1.405 | 0.0935 | 0.2466 |
| REACTOME_RNA_POL_II_TRANSCRIPTION                                                 | 1.404 | 0.1300 | 0.2469 |
| BIOCARTA_HCMV_PATHWAY                                                             | 1.404 | 0.0943 | 0.2462 |
| REACTOME_NUCLEAR_RECEPTOR_TRANSCRIPTION_PATHWAY                                   | 1.402 | 0.1098 | 0.2469 |
| PID_PRLSIGNALINGEVENTSPATHWAY                                                     | 1.400 | 0.1138 | 0.2480 |
| BIOCARTA_BIOPEPTIDES_PATHWAY                                                      | 1.400 | 0.1133 | 0.2477 |
| KEGG_ADIPOCYTOKINE_SIGNALING_PATHWAY                                              | 1.398 | 0.1063 | 0.2487 |

1150  
1151  
1152  
1153  
1154  
1155  
1156  
1157  
1158  
1159  
1160  
1161  
1162  
1163  
1164  
1165  
1166  
1167  
1168  
1169  
1170  
1171  
1172  
1173  
1174  
1175  
1176  
1177  
1178  
1179  
1180  
1181  
1182

1183 **Table S5. GSEA results (FDR < 0.25) for comparison of healthy control tetramer positive**  
 1184 **to healthy control tetramer negative.**

| NAME                                                                                                           | NES    | NOM p-val | FDR q-val  |
|----------------------------------------------------------------------------------------------------------------|--------|-----------|------------|
| REACTOME_SRP_DEPENDENT_COTRANSLATIONAL_PROTEIN_TARGETING_TO_MEMBRANE                                           | 4.5784 | <0.001    | 1<br><0.00 |
| REACTOME_PEPTIDE_CHAIN_ELONGATION                                                                              | 4.4660 | <0.001    | 1<br><0.00 |
| REACTOME_TRANSLATION                                                                                           | 4.4433 | <0.001    | 1<br><0.00 |
| MIPS_RIBOSOME_CYTOPLASMIC                                                                                      | 4.4039 | <0.001    | 1<br><0.00 |
| KEGG_RIBOSOME                                                                                                  | 4.3425 | <0.001    | 1<br><0.00 |
| REACTOME_METABOLISM_OF_PROTEINS                                                                                | 4.3121 | <0.001    | 1<br><0.00 |
| REACTOME_INFLUENZA_VIRAL_RNA_TRANSCRIPTION_AND_REPLICATION                                                     | 4.2863 | <0.001    | 1<br><0.00 |
| REACTOME_3_UTR_MEDIATED_TRANSLATIONAL_REGULATION                                                               | 4.2010 | <0.001    | 1<br><0.00 |
| REACTOME_INFLUENZA_LIFE_CYCLE                                                                                  | 3.9434 | <0.001    | 1<br><0.00 |
| REACTOME_METABOLISM_OF_MRNA                                                                                    | 3.9010 | <0.001    | 1<br><0.00 |
| REACTOME_METABOLISM_OF_RNA                                                                                     | 3.6973 | <0.001    | 1<br><0.00 |
| REACTOME_NONSENSE_MEDIATED_DECAY_ENHANCED_BY_THE_EXON_JUNCTION_COMPLEX                                         | 3.6825 | <0.001    | 1<br><0.00 |
| MIPS_NOP56P_ASSOCIATED_PRE_RRNA_COMPLEX                                                                        | 3.2647 | <0.001    | 1<br><0.00 |
| MIPS_60S_RIBOSOMAL_SUBUNIT_CYTOPLASMIC                                                                         | 3.1934 | <0.001    | 1<br>0.000 |
| REACTOME_ACTIVATION_OF_THE_MRNA_UPON_BINDING_OF_THE_CAP_BINDING_COMPLEX_AND_EIFS_AND_SUBSEQUENT_BINDING_TO_43S | 2.9852 | <0.001    | 2<br>0.000 |
| REACTOME_FORMATION_OF_THE_TERNARY_COMPLEX_AND_SUBSEQUENTLY_THE_43S_COMPLEX                                     | 2.9110 | <0.001    | 2<br>0.000 |
| MIPS_40S_RIBOSOMAL_SUBUNIT_CYTOPLASMIC                                                                         | 2.8496 | <0.001    | 5<br>0.001 |
| REACTOME_IMMUNE_SYSTEM                                                                                         | 2.6550 | <0.001    | 4<br>0.003 |
| REACTOME_ADAPTIVE_IMMUNE_SYSTEM                                                                                | 2.5564 | <0.001    | 3<br>0.003 |
| MIPS_TRBP_CONTAINING_COMPLEX_1                                                                                 | 2.5334 | <0.001    | 8<br>0.007 |
| REACTOME_ANTIGEN_PROCESSING_CROSS_PRESENTATION                                                                 | 2.4612 | <0.001    | 2<br>0.007 |
| PID_CXCR4_PATHWAY                                                                                              | 2.4525 | <0.001    | 4<br>0.008 |
| KEGG_PARKINSONS_DISEASE                                                                                        | 2.4241 | <0.001    | 3<br>0.011 |
| REACTOME_SIGNALING_BY_WNT                                                                                      | 2.3765 | 0.0020    | 1<br>0.011 |
| REACTOME_CTLA4_INHIBITORY_SIGNALING                                                                            | 2.3647 | <0.001    | 7<br>0.012 |
| REACTOME_MRNA_SPLICING                                                                                         | 2.3517 | 0.0019    | 6<br>0.014 |
| BIOCARTA_ERK_PATHWAY                                                                                           | 2.3293 | <0.001    | 0<br>0.013 |
| REACTOME_INTERFERON_SIGNALING                                                                                  | 2.3281 | <0.001    | 6<br>0.015 |
| REACTOME_AUTODEGRADATION_OF_CDH1_BY_CDH1_APC_C                                                                 | 2.3079 | <0.001    | 2<br>0.015 |
| REACTOME_CLASS_I_MHC_MEDIATED_ANTIGEN_PROCESSING_PRESENTATION                                                  | 2.3024 | <0.001    | 3<br>0.015 |
| REACTOME_ER_PHAGOSOME_PATHWAY                                                                                  | 2.3011 | 0.0020    | 0<br>0.016 |
| REACTOME_APC_C_CDC20_MEDIATED_DEGRADATION_OF_MITOTIC_PROTEINS                                                  | 2.2783 | <0.001    | 6          |

|                                                                                                                                |        |        |            |
|--------------------------------------------------------------------------------------------------------------------------------|--------|--------|------------|
| REACTOME_PROCESSING_OF_CAPPED_INTRON_CONTAINING_PRE_MRNA                                                                       | 2.2775 | <0.001 | 0.016<br>2 |
| REACTOME_MRNA_PROCESSING                                                                                                       | 2.2308 | 0.0020 | 0.021<br>7 |
| MIPS_55S_RIBOSOME_MITOCHONDRIAL                                                                                                | 2.1984 | <0.001 | 0.027<br>0 |
| REACTOME_CELL_CYCLE_MITOTIC                                                                                                    | 2.1896 | 0.0043 | 0.028<br>0 |
| KEGG_OXIDATIVE_PHOSPHORYLATION                                                                                                 | 2.1375 | 0.0020 | 0.038<br>4 |
| PID_TELOMERASEPATHWAY                                                                                                          | 2.1303 | 0.0021 | 0.039<br>4 |
| REACTOME_HOST_INTERACTIONS_OF_HIV_FACTORS                                                                                      | 2.1297 | 0.0040 | 0.038<br>5 |
| REACTOME_COSTIMULATION_BY_THE_CD28_FAMILY                                                                                      | 2.0994 | 0.0020 | 0.045<br>0 |
| REACTOME_MITOTIC_PROMETAPHASE                                                                                                  | 2.0919 | <0.001 | 0.046<br>0 |
| KEGG_SPLICEOSOME                                                                                                               | 2.0764 | 0.0020 | 0.049<br>6 |
| REACTOME_MEMBRANE_TRAFFICKING                                                                                                  | 2.0732 | 0.0084 | 0.049<br>8 |
| MIPS_PA28_20S_PROTEASOME                                                                                                       | 2.0694 | 0.0039 | 0.049<br>6 |
| REACTOME_P53_INDEPENDENT_G1_S_DNA_DAMAGE_CHECKPOINT                                                                            | 2.0686 | 0.0041 | 0.048<br>6 |
| REACTOME_APOPTOSIS                                                                                                             | 2.0643 | 0.0036 | 0.048<br>7 |
| REACTOME_DESTABILIZATION_OF_MRNA_BY_AUF1_HNRNP_D0                                                                              | 2.0556 | <0.001 | 0.050<br>8 |
| REACTOME_RESPIRATORY_ELECTRON_TRANSPORT_ATP_SYNTHESIS_BY_CHEMIOSMOTIC_C<br>OUPLING_AND_HEAT_PRODUCTION_BY_UNCOUPLING_PROTEINS_ | 2.0501 | 0.0061 | 0.051<br>2 |
| KEGG_PRIMARY_IMMUNODEFICIENCY                                                                                                  | 2.0356 | 0.0042 | 0.055<br>4 |
| REACTOME_HIV_INFECTION                                                                                                         | 2.0339 | 0.0021 | 0.055<br>0 |
| REACTOME_REGULATION_OF_MITOTIC_CELL_CYCLE                                                                                      | 2.0319 | 0.0041 | 0.054<br>6 |
| REACTOME_REGULATION_OF_MRNA_STABILITY_BY_PROTEINS_THAT_BIND_AU_RICH_ELEM<br>ENTS                                               | 2.0100 | 0.0039 | 0.061<br>2 |
| MIPS_F1F0_ATP_SYNTHASE_MITOCHONDRIAL                                                                                           | 1.9992 | 0.0019 | 0.063<br>8 |
| MIPS_C_COMPLEX_SPLICEOSOME                                                                                                     | 1.9984 | <0.001 | 0.062<br>8 |
| REACTOME_SCF_BETA_TRCP_MEDIATED_DEGRADATION_OF_EMII                                                                            | 1.9931 | 0.0021 | 0.064<br>0 |
| REACTOME_MRNA_SPLICING_MINOR_PATHWAY                                                                                           | 1.9904 | 0.0040 | 0.063<br>7 |
| REACTOME_SYNTHESIS_OF_SUBSTRATES_IN_N_GLYCAN_BIOSYTHESIS                                                                       | 1.9857 | 0.0058 | 0.064<br>4 |
| MIPS_26S_PROTEASOME                                                                                                            | 1.9680 | 0.0057 | 0.070<br>1 |
| REACTOME_REGULATION_OF_APOPTOSIS                                                                                               | 1.9583 | 0.0083 | 0.073<br>3 |
| REACTOME_CROSS_PRESENTATION_OF_SOLUBLE_EXOGENOUS_ANTIGENS_ENDOSOMES                                                            | 1.9569 | 0.0041 | 0.072<br>7 |
| REACTOME_CLEAVAGE_OF_GROWING_TRANSCRIPT_IN_THE_TERMINATION_REGION_                                                             | 1.9561 | 0.0097 | 0.071<br>9 |
| REACTOME_VIF_MEDIATED_DEGRADATION_OF_APOBEC3G                                                                                  | 1.9543 | 0.0059 | 0.071<br>6 |
| REACTOME_INTERFERON_GAMMA_SIGNALING                                                                                            | 1.9356 | 0.0083 | 0.078<br>6 |
| REACTOME_CELL_CYCLE_CHECKPOINTS                                                                                                | 1.9337 | 0.0122 | 0.078<br>2 |
| REACTOME_APC_C_CDH1_MEDIATED_DEGRADATION_OF_CDC20_AND_OTHER_APC_C_CDH1_<br>TARGETED_PROTEINS_IN_LATE_MITOSIS_EARLY_G1          | 1.9316 | 0.0061 | 0.077<br>8 |
| MIPS_20S_PROTEASOME                                                                                                            | 1.9260 | 0.0080 | 0.079<br>1 |
| REACTOME_DEADENYLATION_OF_MRNA                                                                                                 | 1.9129 | 0.0061 | 0.084<br>4 |

|                                                                                   |        |        |       |
|-----------------------------------------------------------------------------------|--------|--------|-------|
| REACTOME_AUTODEGRADATION_OF_THE_E3_UBIQUITIN_LIGASE_COPI                          | 1.9110 | 0.0122 | 0.084 |
|                                                                                   |        |        | 2     |
| REACTOME_FORMATION_OF_ATP_BY_CHEMIOSMOTIC_COUPLING                                | 1.9053 | 0.0038 | 0.085 |
|                                                                                   |        |        | 7     |
| REACTOME_ASSEMBLY_OF_THE_PRE_REPLICATIVE_COMPLEX                                  | 1.8950 | 0.0140 | 0.089 |
|                                                                                   |        |        | 6     |
| REACTOME_PREFOLDIN_MEDIATED_TRANSFER_OF_SUBSTRATE_TO_CCT_TRIC                     | 1.8841 | 0.0109 | 0.094 |
|                                                                                   |        |        | 4     |
| REACTOME_REGULATION_OF_ORNITHINE_DECARBOXYLASE_ODC                                | 1.8813 | 0.0196 | 0.094 |
|                                                                                   |        |        | 5     |
| REACTOME_ANTIGEN_PRESENTATION_FOLDING_ASSEMBLY_AND_PEPTIDE_LOADING_OF_CLASS_I_MHC | 1.8812 | 0.0101 | 0.093 |
|                                                                                   |        |        | 3     |
| REACTOME_PROTEIN_FOLDING                                                          | 1.8799 | 0.0118 | 0.092 |
|                                                                                   |        |        | 7     |
| MIPS_SPLICEOSOME                                                                  | 1.8724 | 0.0096 | 0.095 |
|                                                                                   |        |        | 5     |
| KEGG_PATHOGENIC_ESCHERICHIA_COLI_INFECTION                                        | 1.8644 | 0.0102 | 0.098 |
|                                                                                   |        |        | 0     |
| REACTOME_FORMATION_OF_TUBULIN_FOLDING_INTERMEDIATES_BY_CCT_TRIC                   | 1.8609 | 0.0061 | 0.098 |
|                                                                                   |        |        | 4     |
| REACTOME_CELL_CYCLE                                                               | 1.8472 | 0.0180 | 0.104 |
|                                                                                   |        |        | 2     |
| REACTOME_APC_CDC20_MEDIATED_DEGRADATION_OF_NEK2A                                  | 1.8331 | 0.0220 | 0.111 |
|                                                                                   |        |        | 3     |
| REACTOME_CDK_MEDIATED_PHOSPHORYLATION_AND_REMOVAL_OF_CDC6                         | 1.8210 | 0.0104 | 0.117 |
|                                                                                   |        |        | 7     |
| REACTOME_ANTIGEN_PROCESSING_UBIQUITINATION_PROTEASOME_DEGRADATION                 | 1.8157 | 0.0142 | 0.119 |
|                                                                                   |        |        | 9     |
| KEGG_PROTEASOME                                                                   | 1.8124 | 0.0101 | 0.120 |
|                                                                                   |        |        | 7     |
| REACTOME_P53_DEPENDENT_G1_DNA_DAMAGE_RESPONSE                                     | 1.8077 | 0.0161 | 0.121 |
|                                                                                   |        |        | 9     |
| REACTOME_LOSS_OF_NLP_FROM_MITOTIC_CENTROSOMES                                     | 1.7845 | 0.0136 | 0.136 |
|                                                                                   |        |        | 8     |
| REACTOME_MRNA_3_END_PROCESSING                                                    | 1.7772 | 0.0044 | 0.140 |
|                                                                                   |        |        | 4     |
| MIPS_PA700_20S_PA28_COMPLEX                                                       | 1.7735 | 0.0123 | 0.141 |
|                                                                                   |        |        | 2     |
| REACTOME_CYCLIN_E_ASSOCIATED_EVENTS_DURING_G1_S_TRANSITION                        | 1.7688 | 0.0288 | 0.143 |
|                                                                                   |        |        | 2     |
| REACTOME_TCA_CYCLE_AND_RESPIRATORY_ELECTRON_TRANSPORT                             | 1.7638 | 0.0200 | 0.145 |
|                                                                                   |        |        | 5     |
| KEGG_NITROGEN_METABOLISM                                                          | 1.7591 | 0.0133 | 0.147 |
|                                                                                   |        |        | 1     |
| KEGG_BLADDER_CANCER                                                               | 1.7570 | 0.0232 | 0.147 |
|                                                                                   |        |        | 2     |
| BIOCARTA_CTLA4_PATHWAY                                                            | 1.7537 | 0.0100 | 0.148 |
|                                                                                   |        |        | 2     |
| REACTOME_RESPIRATORY_ELECTRON_TRANSPORT                                           | 1.7530 | 0.0292 | 0.147 |
|                                                                                   |        |        | 0     |
| REACTOME_METABOLISM_OF_AMINO_ACIDS_AND_DERIVATIVES                                | 1.7374 | 0.0218 | 0.157 |
|                                                                                   |        |        | 8     |
| REACTOME_TRANSPORT_TO_THE_GOLGI_AND_SUBSEQUENT_MODIFICATION                       | 1.7357 | 0.0343 | 0.157 |
|                                                                                   |        |        | 3     |
| REACTOME_CYTOKINE_SIGNALING_IN_IMMUNE_SYSTEM                                      | 1.7297 | 0.0196 | 0.160 |
|                                                                                   |        |        | 1     |
| MIPS_CDC5L_COMPLEX                                                                | 1.7279 | 0.0242 | 0.159 |
|                                                                                   |        |        | 9     |
| KEGG_PROTEIN_EXPORT                                                               | 1.7275 | 0.0211 | 0.158 |
|                                                                                   |        |        | 6     |
| REACTOME_POST_TRANSLATIONAL_PROTEIN_MODIFICATION                                  | 1.7270 | 0.0240 | 0.157 |
|                                                                                   |        |        | 5     |
| REACTOME ASPARAGINE_N_LINKED_GLYCOSYLATION                                        | 1.7135 | 0.0252 | 0.167 |
|                                                                                   |        |        | 4     |
| REACTOME_CHOLESTEROL_BIOSYNTHESIS                                                 | 1.6956 | 0.0222 | 0.181 |
|                                                                                   |        |        | 3     |
| PID_IL3_PATHWAY                                                                   | 1.6934 | 0.0287 | 0.181 |
|                                                                                   |        |        | 6     |
| REACTOME_CDT1_ASSOCIATION_WITH_THE_CDC6_ORC_ORIGIN_COMPLEX                        | 1.6927 | 0.0462 | 0.180 |
|                                                                                   |        |        | 4     |



|                                                                                                                                      |        |        |       |
|--------------------------------------------------------------------------------------------------------------------------------------|--------|--------|-------|
| REACTOME_GOLGI_ASSOCIATED_VESICLE_BIOGENESIS                                                                                         | 1.6876 | 0.0205 | 0.183 |
|                                                                                                                                      |        |        | 8     |
| REACTOME_PHOSPHORYLATION_OF_CD3_AND_TCR_ZETA_CHAINS                                                                                  | 1.6875 | 0.0342 | 0.182 |
|                                                                                                                                      |        |        | 1     |
| REACTOME_GENERATION_OF_SECOND_MESSENGER_MOLECULES                                                                                    | 1.6854 | 0.0205 | 0.182 |
|                                                                                                                                      |        |        | 4     |
| REACTOME_ANTIVIRAL_MECHANISM_BY_IFN_STIMULATED_GENES                                                                                 | 1.6847 | 0.0297 | 0.181 |
|                                                                                                                                      |        |        | 3     |
| MIPS_39S_RIBOSOMAL_SUBUNIT_MITOCHONDRIAL                                                                                             | 1.6812 | 0.0324 | 0.183 |
|                                                                                                                                      |        |        | 0     |
| KEGG_CHEMOKINE_SIGNALING_PATHWAY                                                                                                     | 1.6772 | 0.0367 | 0.185 |
|                                                                                                                                      |        |        | 2     |
| REACTOME_IMMUNOREGULATORY_INTERACTIONS_BETWEEN_A_LYMPHOID_AND_A_NON_LYMPHOID_CELL                                                    | 1.6688 | 0.0400 | 0.191 |
|                                                                                                                                      |        |        | 3     |
| BIOCARTA_IL2RB_PATHWAY                                                                                                               | 1.6623 | 0.0347 | 0.195 |
|                                                                                                                                      |        |        | 5     |
| REACTOME_MITOTIC_G1_G1_S_PHASES                                                                                                      | 1.6586 | 0.0348 | 0.197 |
|                                                                                                                                      |        |        | 4     |
| MIPS_TNF_ALPHA_NF_KAPPA_B_SIGNALING_COMPLEX_6                                                                                        | 1.6576 | 0.0218 | 0.196 |
|                                                                                                                                      |        |        | 8     |
| MIPS_28S_RIBOSOMAL_SUBUNIT_MITOCHONDRIAL                                                                                             | 1.6572 | 0.0315 | 0.195 |
|                                                                                                                                      |        |        | 6     |
| REACTOME_APC_C_CDC20_MEDIATED_DEGRADATION_OF_CYCLIN_B                                                                                | 1.6556 | 0.0345 | 0.195 |
|                                                                                                                                      |        |        | 5     |
| REACTOME_ORC1_REMOVAL_FROM_CHROMATIN                                                                                                 | 1.6472 | 0.0386 | 0.201 |
|                                                                                                                                      |        |        | 8     |
| REACTOME_INHIBITION_OF_THE_PROTEOLYTIC_ACTIVITY_OF_APC_C_REQUIRED_FOR_THE_ONSET_OF_ANAPHASE_BY_MITOTIC_SPINDLE_CHECKPOINT_COMPONENTS | 1.6381 | 0.0270 | 0.209 |
|                                                                                                                                      |        |        | 5     |
| BIOCARTA_BCELLSURVIVAL_PATHWAY                                                                                                       | 1.6252 | 0.0414 | 0.221 |
|                                                                                                                                      |        |        | 2     |
| BIOCARTA_PROTEASOME_PATHWAY                                                                                                          | 1.6242 | 0.0227 | 0.220 |
|                                                                                                                                      |        |        | 5     |
| KEGG_REGULATION_OF_ACTIN_CYTOSKELETON                                                                                                | 1.6228 | 0.0425 | 0.220 |
|                                                                                                                                      |        |        | 0     |
| PID_IL8CXCR2_PATHWAY                                                                                                                 | 1.6211 | 0.0454 | 0.219 |
|                                                                                                                                      |        |        | 9     |
| REACTOME_CTNNB1_PHOSPHORYLATION_CASCADE                                                                                              | 1.6209 | 0.0387 | 0.218 |
|                                                                                                                                      |        |        | 2     |
| REACTOME_RNA_POL_II_TRANSCRIPTION                                                                                                    | 1.6194 | 0.0417 | 0.218 |
|                                                                                                                                      |        |        | 1     |
| BIOCARTA_EIF_PATHWAY                                                                                                                 | 1.6178 | 0.0476 | 0.218 |
|                                                                                                                                      |        |        | 1     |
| REACTOME_POST_CHAPERONIN_TUBULIN_FOLDING_PATHWAY                                                                                     | 1.6122 | 0.0528 | 0.222 |
|                                                                                                                                      |        |        | 0     |
| REACTOME_SCFSKP2_MEDIATED_DEGRADATION_OF_P27_P21                                                                                     | 1.6112 | 0.0454 | 0.221 |
|                                                                                                                                      |        |        | 5     |
| PID_TCR_PATHWAY                                                                                                                      | 1.6094 | 0.0431 | 0.221 |
|                                                                                                                                      |        |        | 6     |
| REACTOME_MITOTIC_G2_G2_M_PHASES                                                                                                      | 1.6030 | 0.0413 | 0.226 |
|                                                                                                                                      |        |        | 6     |
| KEGG_ANTIGEN_PROCESSING_AND_PRESENTATION                                                                                             | 1.5905 | 0.0626 | 0.238 |
|                                                                                                                                      |        |        | 9     |
| PID_IL6_7PATHWAY                                                                                                                     | 1.5888 | 0.0422 | 0.239 |
|                                                                                                                                      |        |        | 0     |
| REACTOME_CONVERSION_FROM_APC_C_CDC20_TO_APC_C_CDH1_IN_LATE_ANAPHASE                                                                  | 1.5860 | 0.0398 | 0.240 |
|                                                                                                                                      |        |        | 5     |
| BIOCARTA_MTOR_PATHWAY                                                                                                                | 1.5772 | 0.0530 | 0.248 |
|                                                                                                                                      |        |        | 4     |
| REACTOME_PHOSPHORYLATION_OF_THE_APC_C                                                                                                | 1.5754 | 0.0494 | 0.248 |
|                                                                                                                                      |        |        | 5     |
| PID_GMCSF_PATHWAY                                                                                                                    | 1.5735 | 0.0575 | 0.248 |
|                                                                                                                                      |        |        | 7     |
| KEGG_PROGESTERONE_MEDIATED_OOCYTE_MATURATION                                                                                         | 1.5725 | 0.0447 | 0.247 |
|                                                                                                                                      |        |        | 8     |

1185  
1186  
1187  
1188  
1189

**Table S6: Curated gene signatures corresponding to Figure 4C.**

| Gene Set                                  | Description                                                                                                                                                                                                                                      | Reference         | Gene Symbols                                                                                                                                                                                                                                                             |
|-------------------------------------------|--------------------------------------------------------------------------------------------------------------------------------------------------------------------------------------------------------------------------------------------------|-------------------|--------------------------------------------------------------------------------------------------------------------------------------------------------------------------------------------------------------------------------------------------------------------------|
| MOG induced EAE <sup>+</sup>              | Gene signature comprised of differentially expressed genes in MOG induced EAE in rats.                                                                                                                                                           | (37)              | See Supplementary Table 4.                                                                                                                                                                                                                                               |
| Th1 signature <sup>+</sup>                | Th1-specific gene signature derived from C57BL/6 mice.                                                                                                                                                                                           | (38)              | See Supplementary Table 4.                                                                                                                                                                                                                                               |
| Th2 signature <sup>+</sup>                | Th2-specific gene signature derived from C57BL/6 mice.                                                                                                                                                                                           | (38)              | See Supplementary Table 4.                                                                                                                                                                                                                                               |
| Th17 signature <sup>+</sup>               | Th17-specific gene signature derived from C57BL/6 mice.                                                                                                                                                                                          | (38)              | See Supplementary Table 4.                                                                                                                                                                                                                                               |
| Pathogenic Th17 <sup>+</sup>              | Pathogenic signature of Th17 cells derived by Lee et. al.                                                                                                                                                                                        | (16)              | See Figure 4D for 23-list gene set.                                                                                                                                                                                                                                      |
| Th17 differential expression <sup>+</sup> | Differentially expressed Th17 genes derived from comparison of Th17 cells induced with TGFb1 and IL-6 versus TGFb3 and IL-6.                                                                                                                     | (16)              | See Supplementary Table 1.                                                                                                                                                                                                                                               |
| Th17 cytokines                            | Cytokines up-regulated in mouse Th17 cells relative to Th0 cells.                                                                                                                                                                                | (39)<br>Figure 3B | IL23R, IL9, IL17R, IL17A, IL24, IL12RB1, IL17F, LIF, IL10, TNFRSF8, IL21, IL1R1                                                                                                                                                                                          |
| Th17 combinatorial core                   | Combinatorial core of transcription factor targets involved in Th17 cell specification.                                                                                                                                                          | (39)<br>Figure 6D | STAT3, IRF4, RORC, MAF, BATF, FOSL2, CYSLTR2, CCL5, HIF1A, IL18RAP, IL17A, IL17F, CCL20, CCR8, IL2, CXCR3, TBX21, CCL4, CCL3, CCR6, IL1R1, GPR15, IL18R1, IL21RB1, IL7R, IL2RA, LTB4R1, IL12RB2, LTB, IL10RA, SMAD3, IL23A, CCR7, IL24, IL4RA, IL21, CXCL10, IL6RA, IL16 |
| PLP induced EAE <sup>+</sup>              | Gene signature comprised of differentially expressed genes in PLP induced EAE (SJL/J mice).                                                                                                                                                      | (35)              | See Supplementary Table 5.                                                                                                                                                                                                                                               |
| Th17.1 EM selective                       | Th17.1 effector memory selective genes identified using FACs-sorted and <i>ex-vivo</i> stimulated human CD4 <sup>+</sup> CD25 <sup>-</sup> CRTH2 <sup>-</sup> CCR7 <sup>lo</sup> CCR6 <sup>+</sup> CCR4 <sup>lo</sup> CXCR3 <sup>hi</sup> cells. | (40)<br>Table S1  | ME1, ENPP1, ADAM23, COLQ, SLC4A10, CA2, SCRNI, ABCB1, CLEC2B, CCR2, DPP4, KLRB1                                                                                                                                                                                          |
| Th17 EM core                              | Th17 effector memory core genes identified using FACs-sorted and <i>ex-vivo</i> stimulated human CD4 <sup>+</sup> CD25 <sup>-</sup> CRTH2 <sup>-</sup> CCR7 <sup>lo</sup> CCR6 <sup>+</sup> CCR4 <sup>lo</sup> CXCR3 <sup>hi</sup> cells.        | (40)<br>Table S1  | IL17RE, PIK3R6, HLF, CCR6, RORC, CTSH, LRP12, CHN1, HPGD, ADAM12, PTPN13                                                                                                                                                                                                 |
| MDR1 Th17.1 EM in Crohn's patients        | <i>Ex vivo</i> transcriptional signature of MDR1 <sup>+</sup> Th17.1 effector memory cells isolated from Crohn's disease patient lesions.                                                                                                        | (40)<br>Table S2  | ABCB1, ND6, GNLY, CDR1, CCL5, IL2, ADAM23, MALAT1, CA2, LRRN3, IL22, GPR15, DSE, IL18RAP, CCL20, GAB3, PELO, ARHGEF4, CSF2, PDE4DIP, SLC4A10, TUBB2A, MIR221, CDC42EP5, MYBL1, SYTL2, FERMT2, B3GALT2, RPL41, PRF1, PLCB1, TLE1, AUTS2, ERN1, CXCR6, IL23R, LGALS3       |
| Th17 EM selective                         | Th17.1 EM specific genes of FACs-sorted and <i>ex-vivo</i> stimulated human CD4 <sup>+</sup> CD25 <sup>-</sup> CRTH2 <sup>-</sup> CCR7 <sup>lo</sup> CCR6 <sup>+</sup> CCR4 <sup>lo</sup> CXCR3 <sup>hi</sup> cells.                             | (40)<br>Table S1  | SHF, IL17A, IL17F, ATP1B1, S100A4, NTRK2, PLD1, PPARG, ITGAE, PAK3, TMOD1, IL26, TIMP4, HRH4, TIMP1                                                                                                                                                                      |

<sup>+</sup>For gene sets derived from rat or mice, gene symbols were mapped using HGNC gene checker.

1193  
1194

**Table S7. Gene sets used for leading edge analysis to define pathogenic gene signature.**

| NAME                                         | SIZE | NES    | FDR q-val |
|----------------------------------------------|------|--------|-----------|
| KEGG_CYTOKINE_CYTOKINE_RECEPTOR_INTERACTION  | 87   | 5.2552 | <0.001    |
| PID_NFAT_TFPATHWAY                           | 39   | 3.7971 | <0.001    |
| BIOCARTA_CYTOKINE_PATHWAY                    | 12   | 3.5986 | <0.001    |
| REACTOME_GPCR_LIGAND_BINDING                 | 53   | 3.5342 | <0.001    |
| REACTOME_CLASS_A1_RHODOPSIN_LIKE_RECEPTORS   | 43   | 3.4971 | <0.001    |
| PID_API1_PATHWAY                             | 44   | 3.3188 | <0.001    |
| PID_ATF2_PATHWAY                             | 32   | 3.2134 | <0.001    |
| REACTOME_GPCR_DOWNSTREAM_SIGNALING           | 106  | 3.1118 | 0.0001    |
| REACTOME_SIGNALING_BY_GPCR                   | 139  | 3.0468 | 0.0001    |
| REACTOME_CHEMOKINE_RECEPTORS_BIND_CHEMOKINES | 21   | 3.0431 | 0.0001    |
| PID_TCRCALCIUMPATHWAY                        | 20   | 2.9931 | 0.0001    |
| REACTOME_PEPTIDE_LIGAND_BINDING_RECEPTORS    | 27   | 2.8743 | 0.0001    |
| PID_IL23PATHWAY                              | 24   | 2.7896 | 0.0002    |
| PID_REG_GR_PATHWAY                           | 53   | 2.7694 | 0.0002    |
| KEGG_TYPE_I_DIABETES_MELLITUS                | 22   | 2.6357 | 0.0008    |
| PID_SYNDECAN_2_PATHWAY                       | 22   | 2.0995 | 0.0215    |
| BIOCARTA_TOB1_PATHWAY                        | 16   | 2.0789 | 0.0234    |

1195  
1196  
1197  
1198  
1199  
1200  
1201  
1202  
1203  
1204  
1205  
1206  
1207  
1208  
1209  
1210  
1211  
1212  
1213  
1214  
1215  
1216  
1217  
1218  
1219  
1220

1221 **Table S8. Summary of networks constructed by IPA from pathogenic signature.** Networks  
 1222 1,2 and 8 were merged for subsequent analysis in figure 4D and networks 3-7 were merged for  
 1223 presentation in figure S15.  
 1224

| Network ID | Score | Number Focus Molecules | Top Diseases and Functions                                                                             |
|------------|-------|------------------------|--------------------------------------------------------------------------------------------------------|
| 1          | 56    | 29                     | Cell Signaling, Molecular Transport, Vitamin and Mineral Metabolism                                    |
| 2          | 41    | 23                     | Cellular Development, Hematological System Development and Function, Hematopoiesis                     |
| 3          | 38    | 22                     | Cellular Development, Cellular Growth and Proliferation, Hematological System Development and Function |
| 4          | 31    | 19                     | Cell Signaling, Molecular Transport, Vitamin and Mineral Metabolism                                    |
| 5          | 31    | 19                     | Endocrine System Disorders, Gastrointestinal Disease, Metabolic Disease                                |
| 6          | 31    | 19                     | Cell Cycle, Amino Acid Metabolism, Post-Translational Modification                                     |
| 7          | 31    | 21                     | Cell Death and Survival, Cellular Development, Hematopoiesis                                           |
| 8          | 26    | 17                     | Immunological Disease, Inflammatory Disease, Inflammatory Response                                     |
| 9          | 20    | 15                     | Cellular Movement, Hematological System Development and Function, Immune Cell Trafficking              |
| 10         | 17    | 12                     | Cell Death and Survival, Hematological System Development and Function, Immune Cell Trafficking        |
| 11         | 16    | 12                     | Cell Death and Survival, Cellular Compromise, Cellular Assembly and Organization                       |
| 12         | 15    | 11                     | Cell Cycle, Gastrointestinal Disease, Organismal Injury and Abnormalities                              |
| 13         | 2     | 1                      | Cell Death and Survival, Connective Tissue Development and Function, Gene Expression                   |
| 14         | 1     | 1                      | Cancer, Reproductive System Disease, Lymphoid Tissue Structure and Development                         |

1225  
 1226
